# Supplementary material
Source: MDPI journal article supplement (https://www.mdpi.com/2312-7481/8/12/178)

Supplementary information for

**Magnetic field assisted spark discharge-generated gold nanostructures: XPS study of nitrogen gas fate and chemical composition of gold thin films**

Stefan Rucman<sup>a</sup>, Winai Thongpan<sup>b</sup>, Watikon Sroila<sup>a</sup>, Niwat Jhuntama<sup>c</sup>, Pisith Singjai<sup>a,d</sup>

- a) Department of Physics and Materials Science, Faculty of Science, Chiang Mai University, Chiang Mai Thailand
- b) Department of Physics, Faculty of Science and Technology, Thammasat University, Pathumthani 12120, Thailand
- c) Faculty of Science and Agricultural Technology, Rajamangala University of Technology Lanna, Chiang Mai 50300, Thailand
- d) Center of Excellence in Materials Science and Technology, Chiang Mai University, Chiang Mai 50200, Thailand,

S1: SEM images of gold wire sparked in ambient air

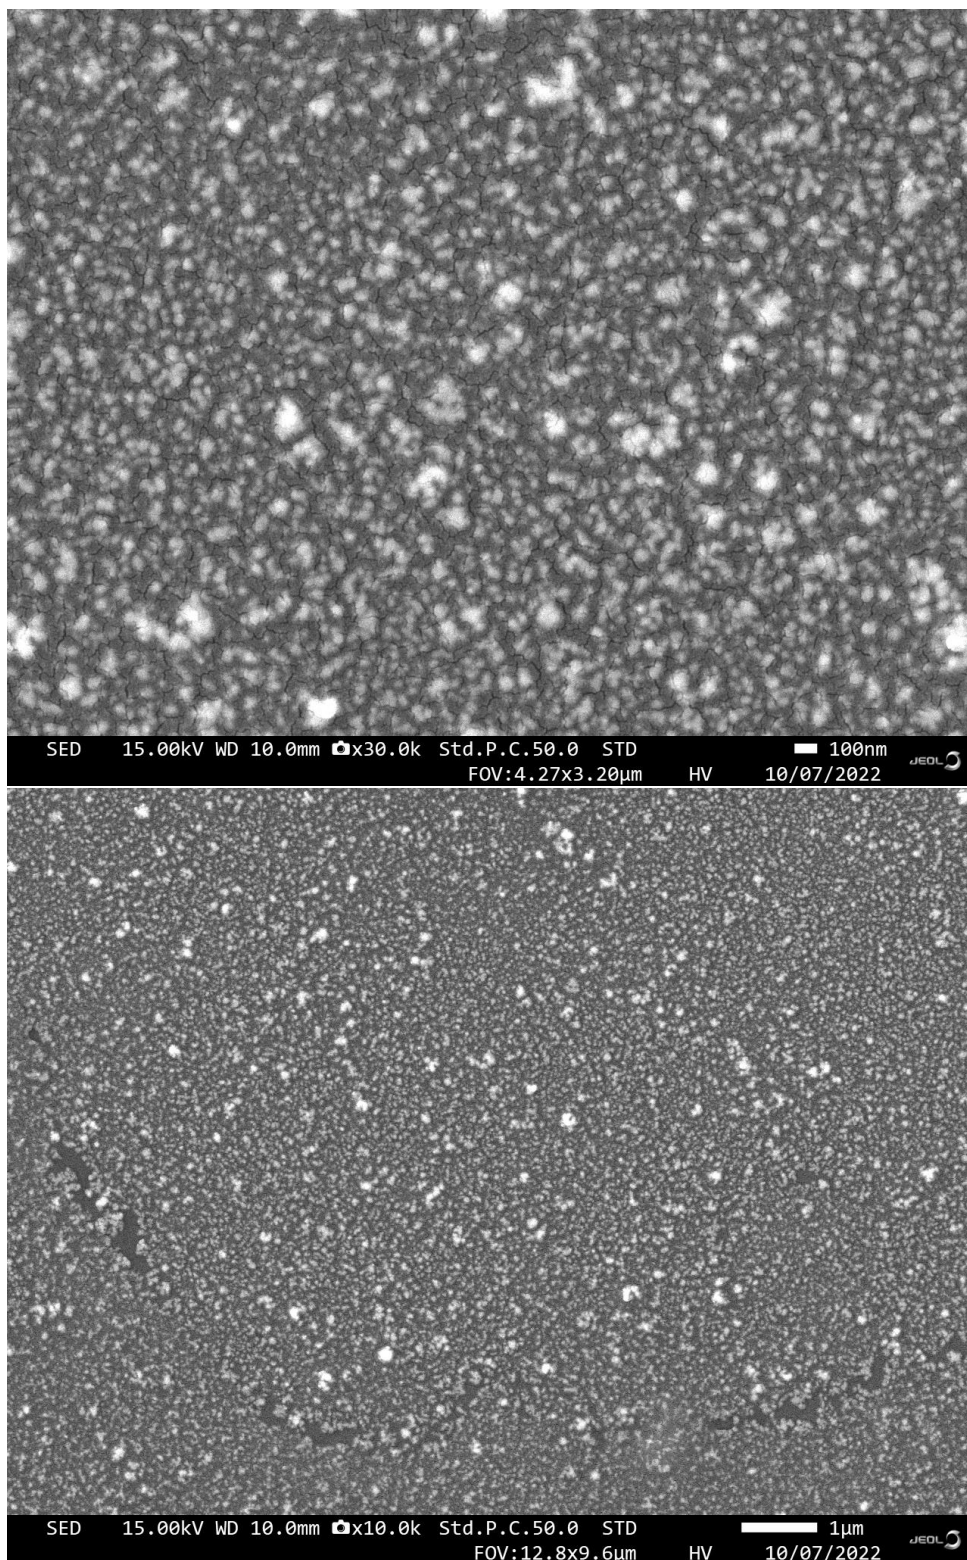

S1: SEM images of gold wire sparked in ambient air

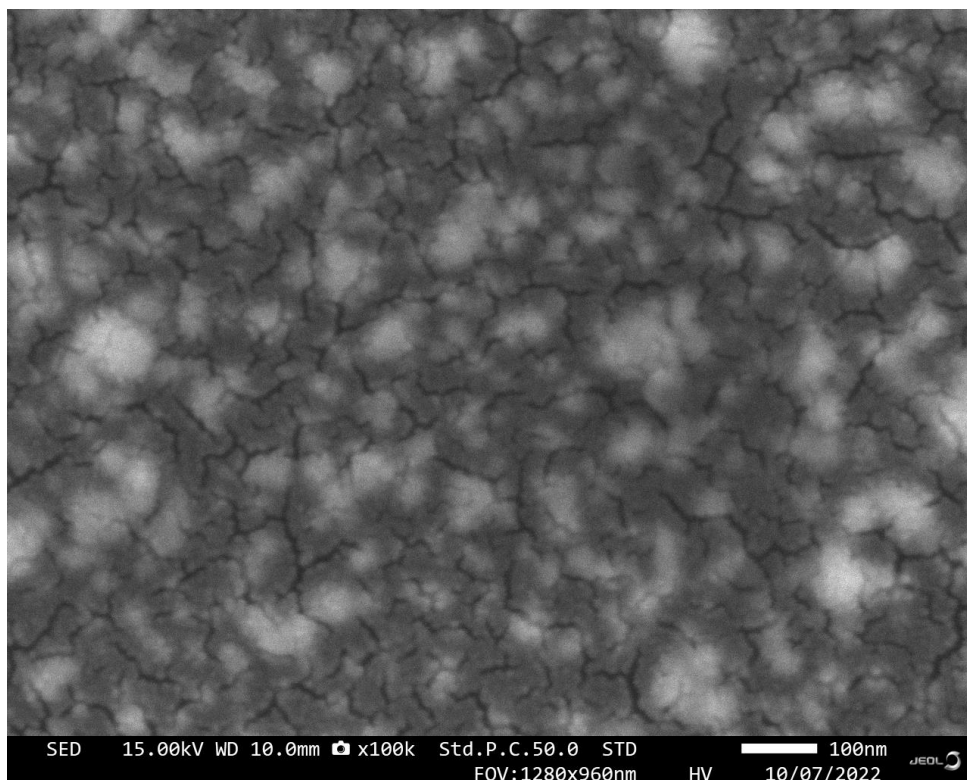

S2: XPS of gold wire sparked in ambient air

O 1s 1 re:34(3-10-2022)

XPS Spectrum Lens Mode:Hybrid Resolution:Pass energy 20 Iris(Aper):slot(Slot)  
Acqn. Time(s): 121 Sweeps: 2 Anode:Mono(Al (Mono))(150 W) Step(meV): 100.0  
Dwell Time(ms): 261 Charge Neutraliser :On Acquired On :22/10/03 13:40:15

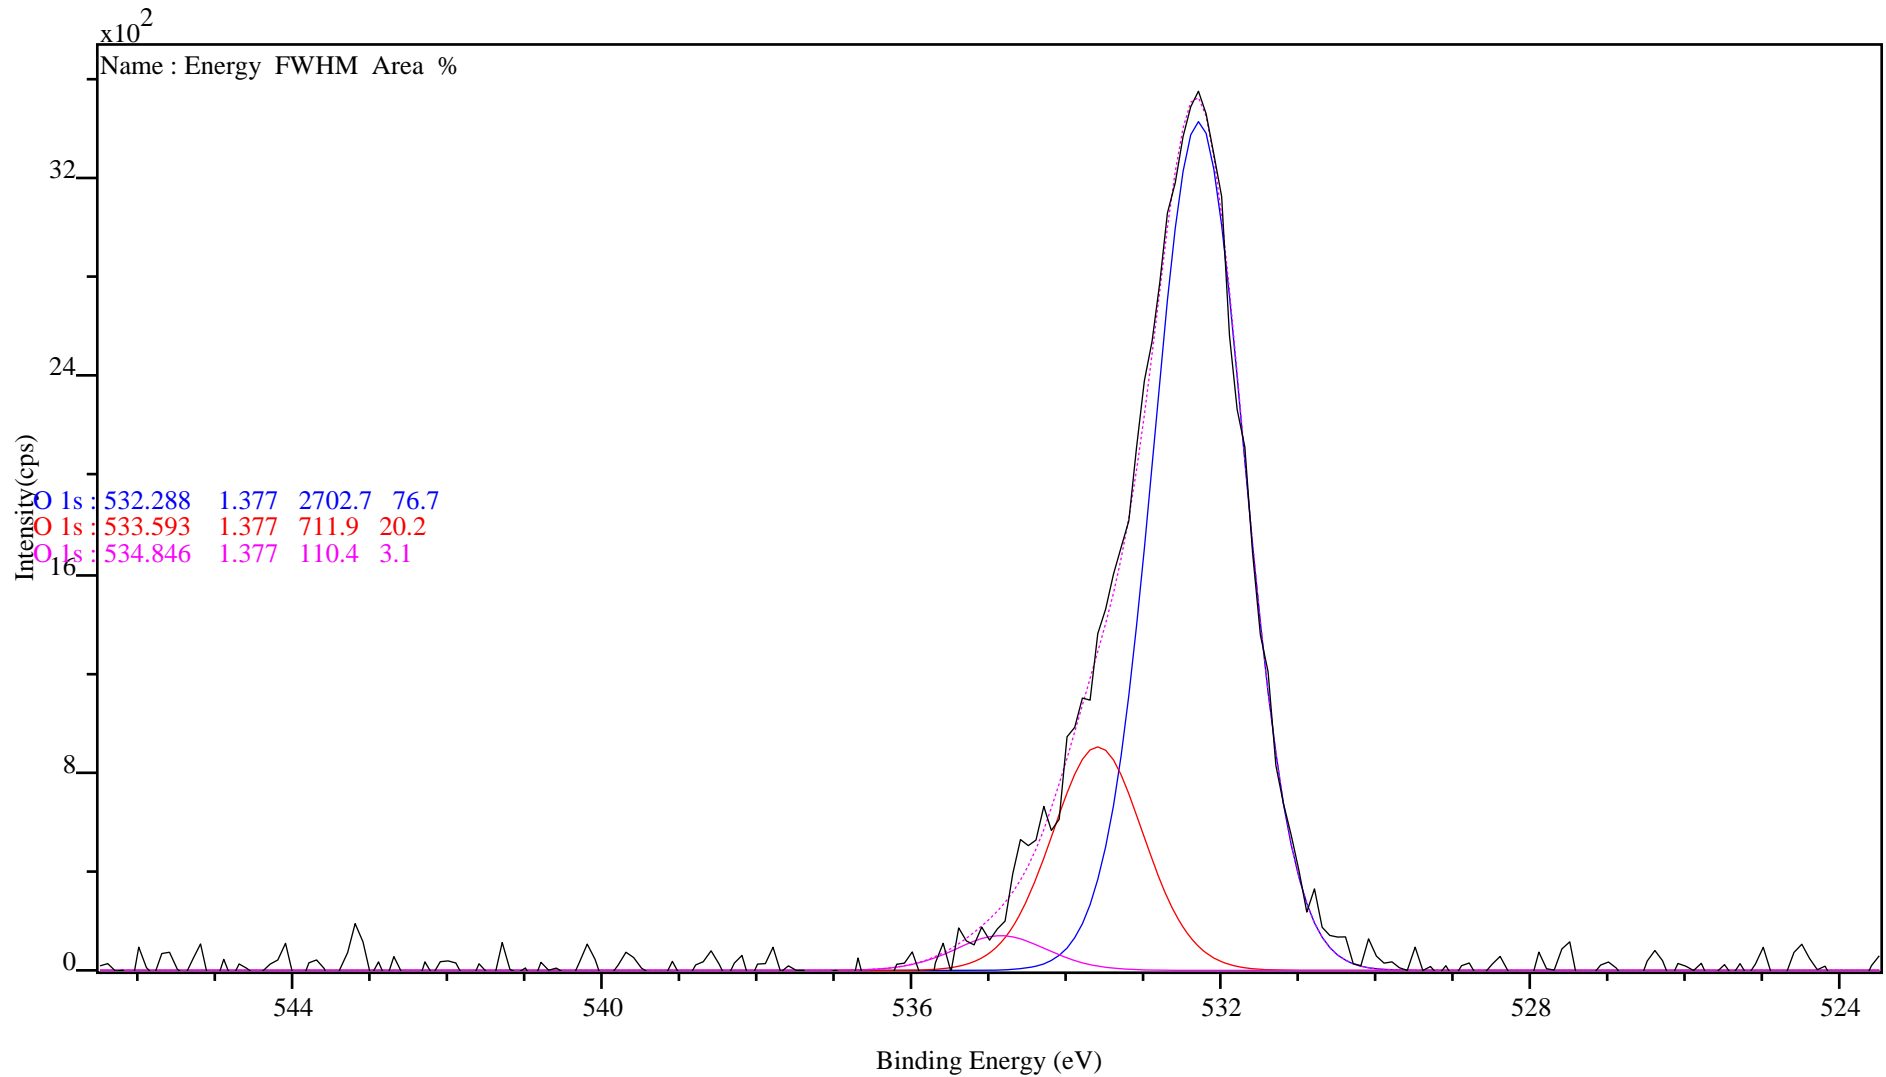

N 1s 1 re:35(3-10-2022)

XPS Spectrum Lens Mode:Hybrid Resolution:Pass energy 20 Iris(Aper):slot(Slot)  
Acqn. Time(s): 121 Sweeps: 2 Anode:Mono(Al (Mono))(150 W) Step(meV): 100.0  
Dwell Time(ms): 286 Charge Neutraliser :On Acquired On :22/10/03 13:40:15

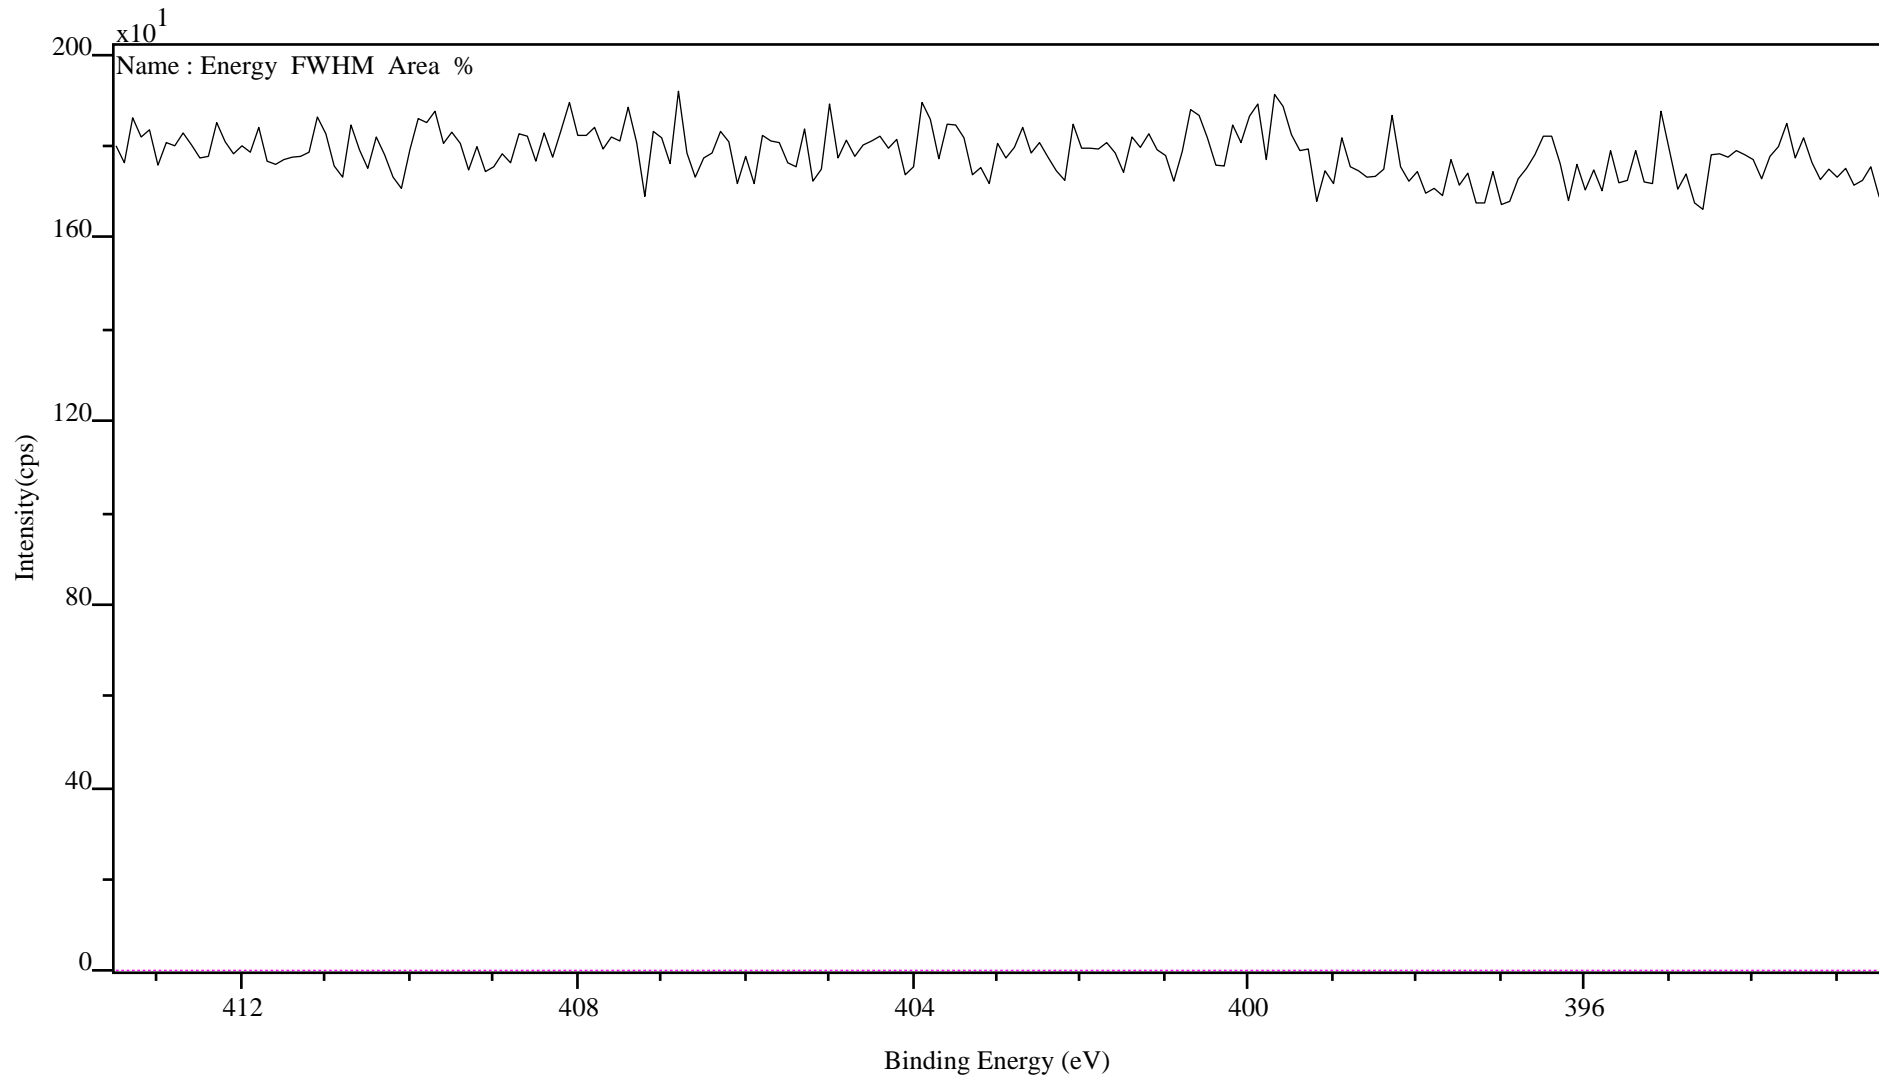

C 1s 1 re:36(3-10-2022)

XPS Spectrum Lens Mode:Hybrid Resolution:Pass energy 20 Iris(Aper):slot(Slot)  
Acqn. Time(s): 120 Sweeps: 2 Anode:Mono(Al (Mono))(150 W) Step(meV): 100.0  
Dwell Time(ms): 250 Charge Neutraliser :On Acquired On :22/10/03 13:40:15

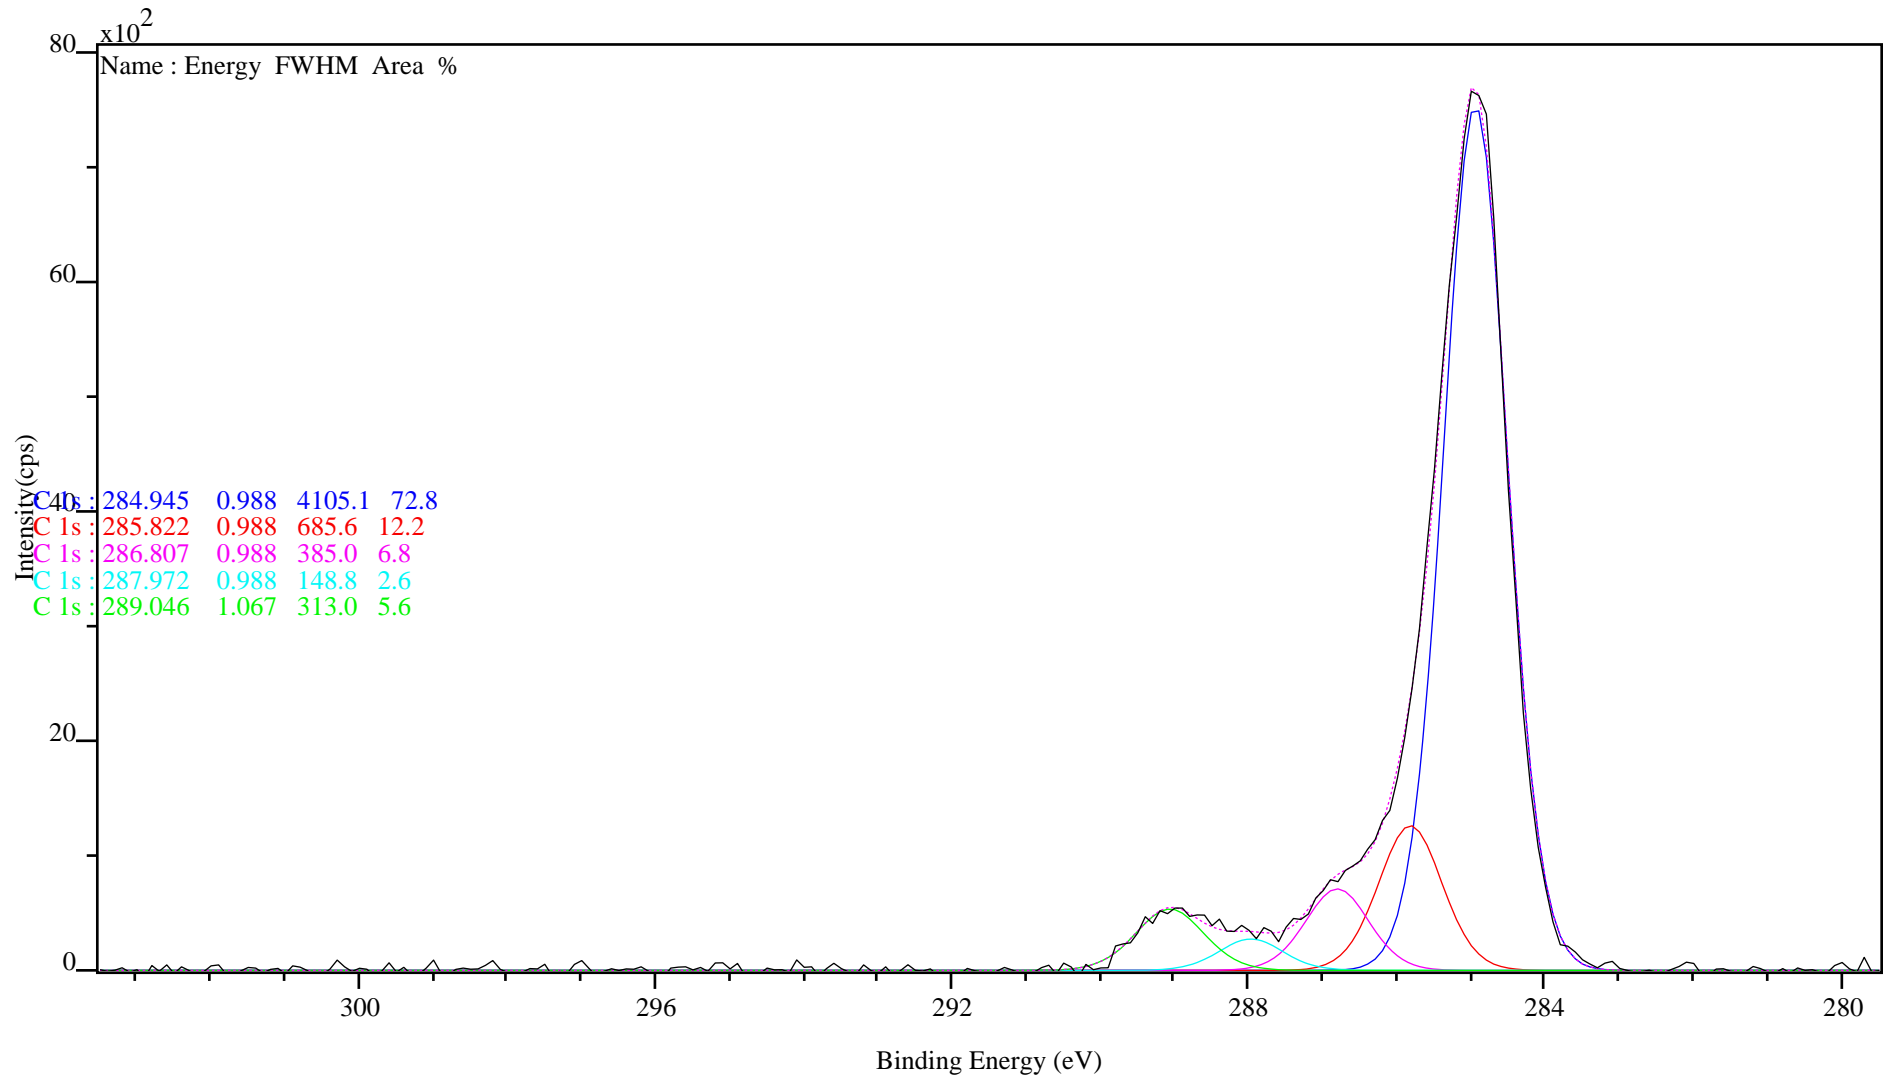

Au 4f 1 re:37(3-10-2022)

XPS Spectrum Lens Mode:Hybrid Resolution:Pass energy 20 Iris(Aper):slot(Slot)  
Acqn. Time(s): 121 Sweeps: 2 Anode:Mono(Al (Mono))(150 W) Step(meV): 100.0  
Dwell Time(ms): 400 Charge Neutraliser :On Acquired On :22/10/03 13:40:15

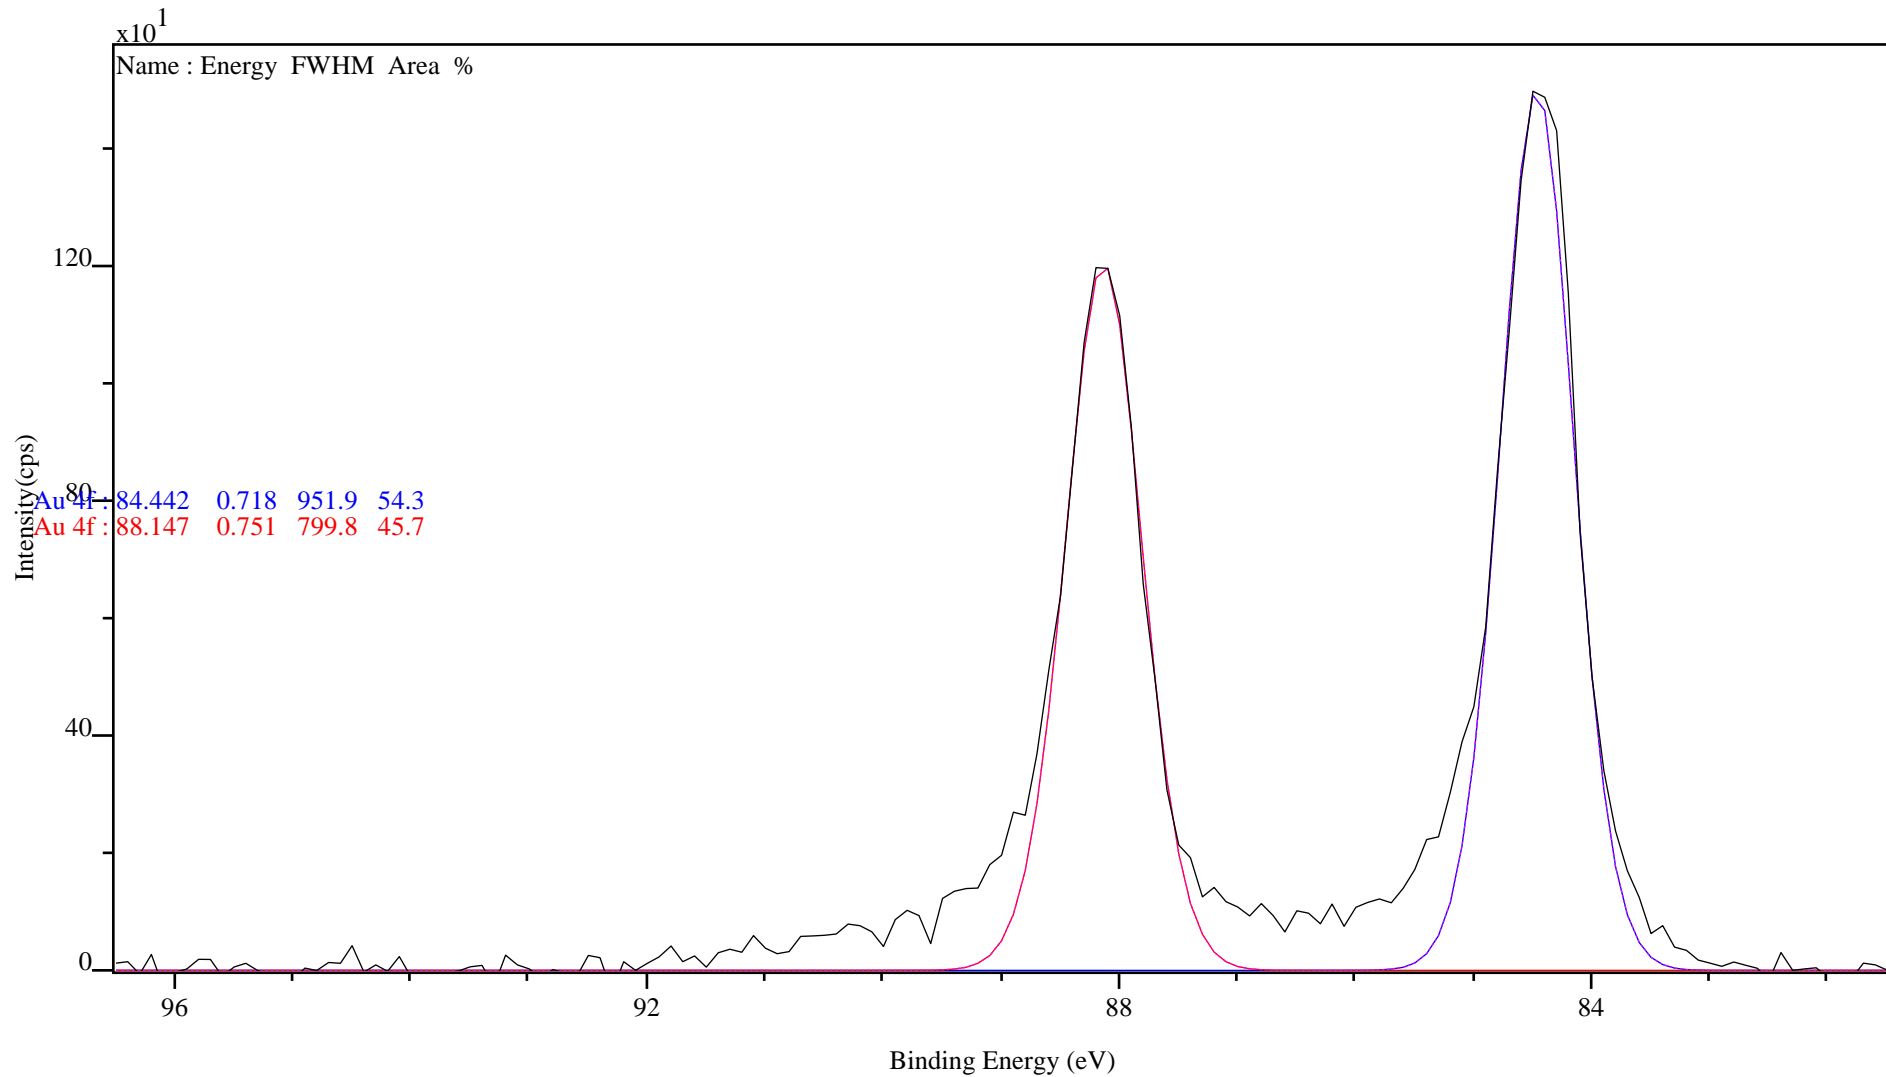

Valence 1 re:38(3-10-2022)

XPS Spectrum Lens Mode:Hybrid Resolution:Pass energy 20 Iris(Aper):slot(Slot)  
Acqn. Time(s): 121 Sweeps: 2 Anode:Mono(Al (Mono))(150 W) Step(meV): 100.0  
Dwell Time(ms): 300 Charge Neutraliser :On Acquired On :22/10/03 13:40:15

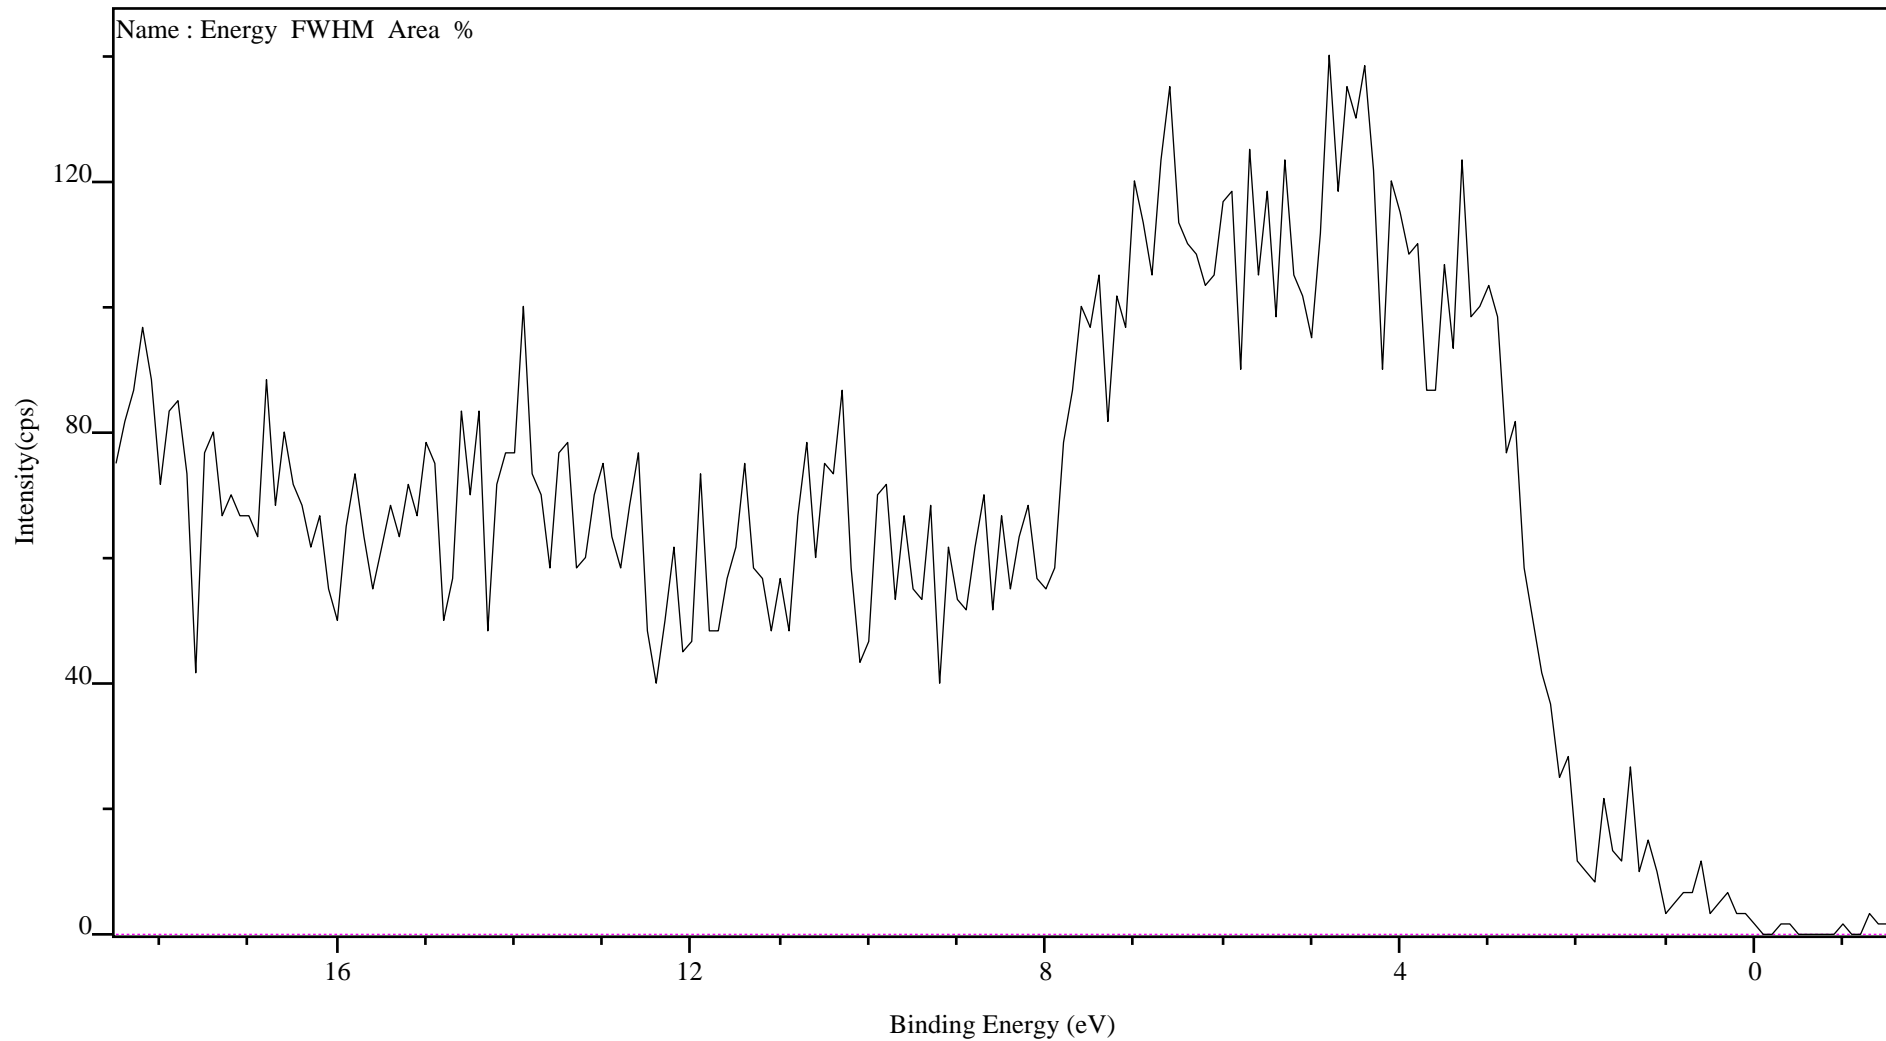



wide 1 re:33(3-10-2022)

XPS Spectrum Lens Mode:Hybrid Resolution:Pass energy 80 Iris(Aper):slot(Slot)  
Acqn. Time(s): 121 Sweeps: 1 Anode:Mono(Al (Mono))(150 W) Step(meV): 1000.0  
Dwell Time(ms): 100 Charge Neutraliser :On Acquired On :22/10/03 13:37:18

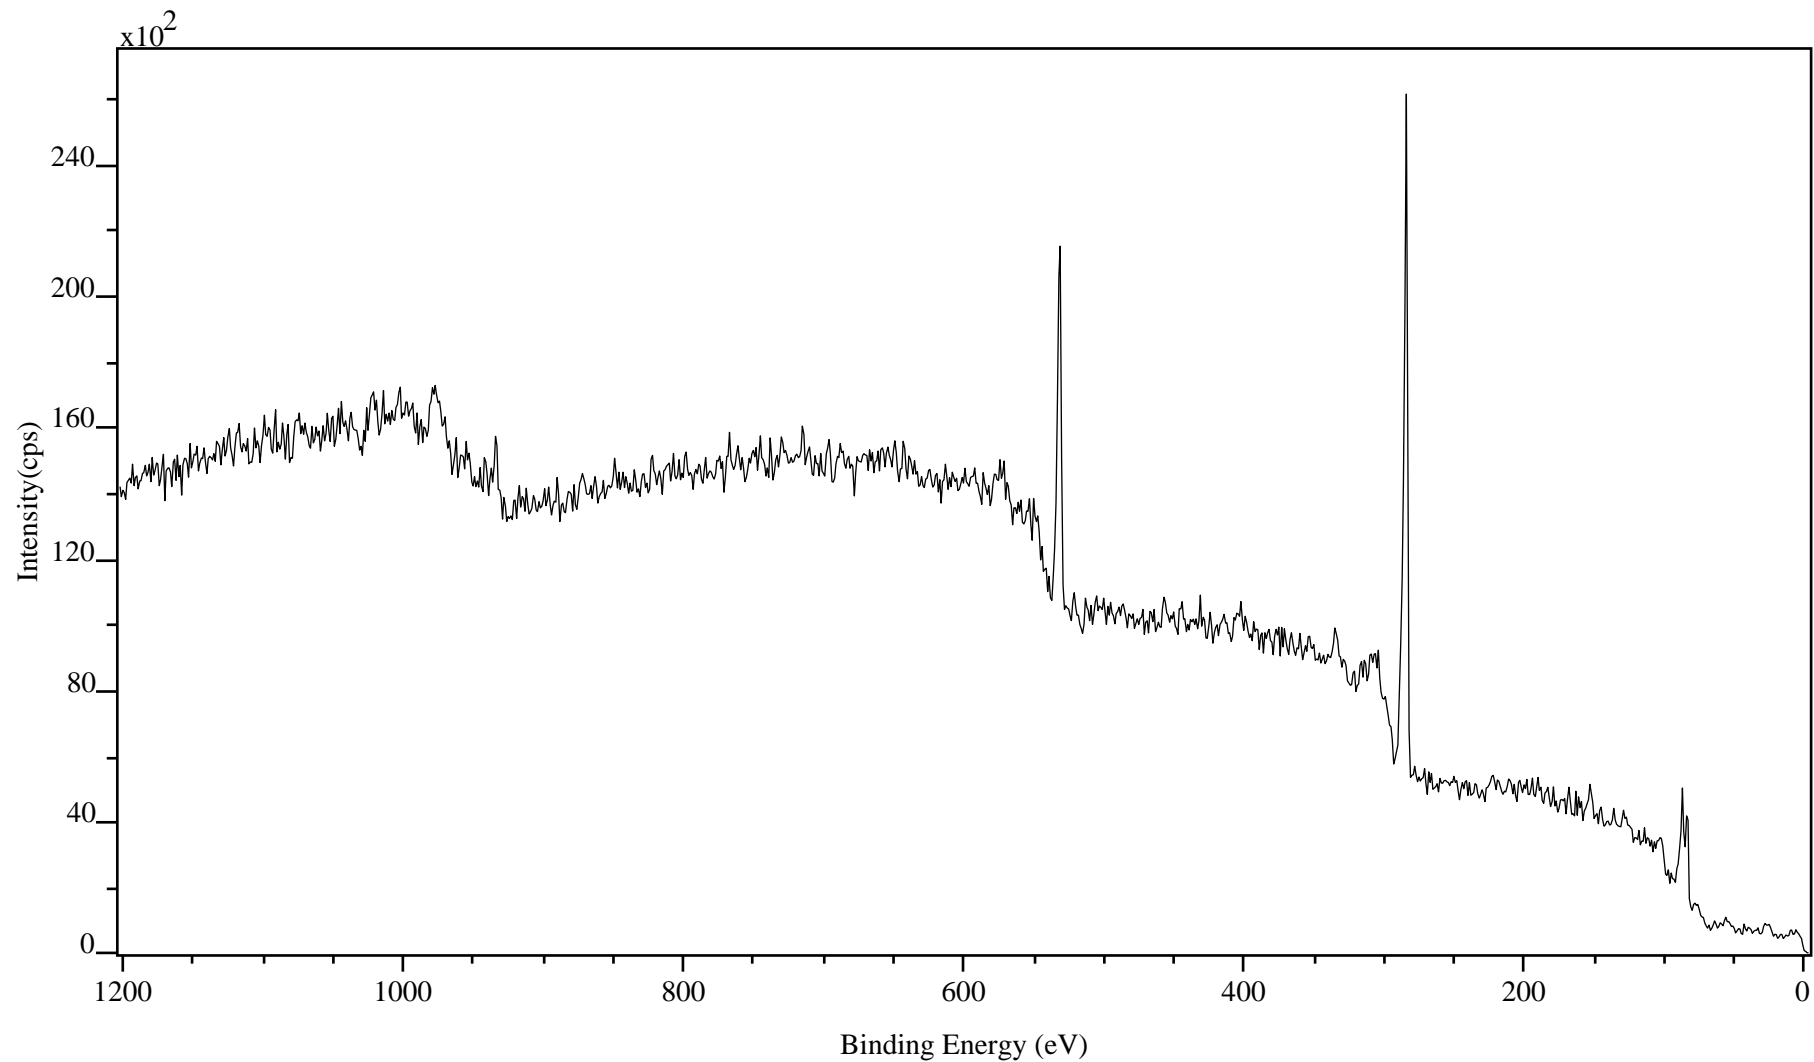

S3: gold sparked in the magnetic field under ambient air

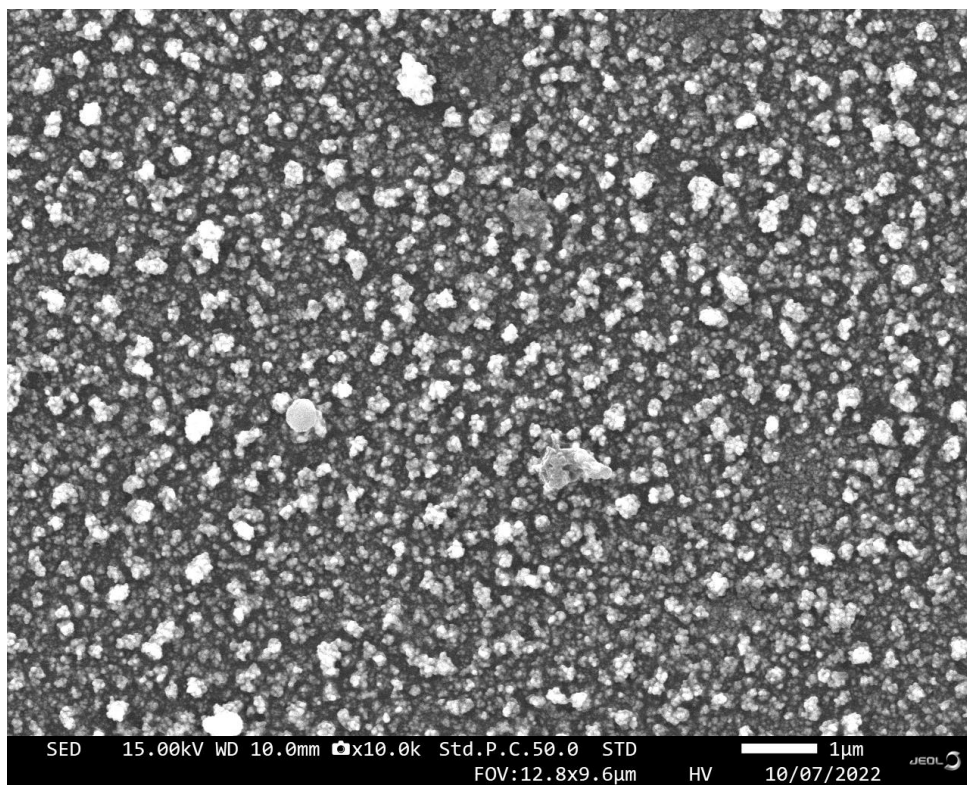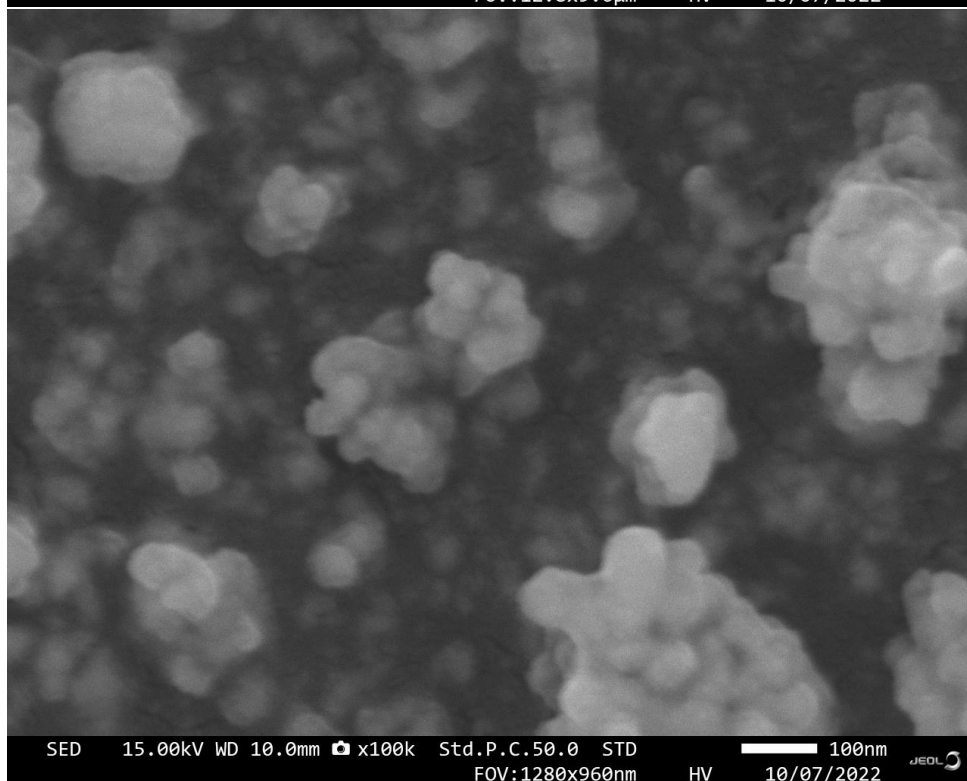

S3: gold sparked in the magnetic field under ambient air

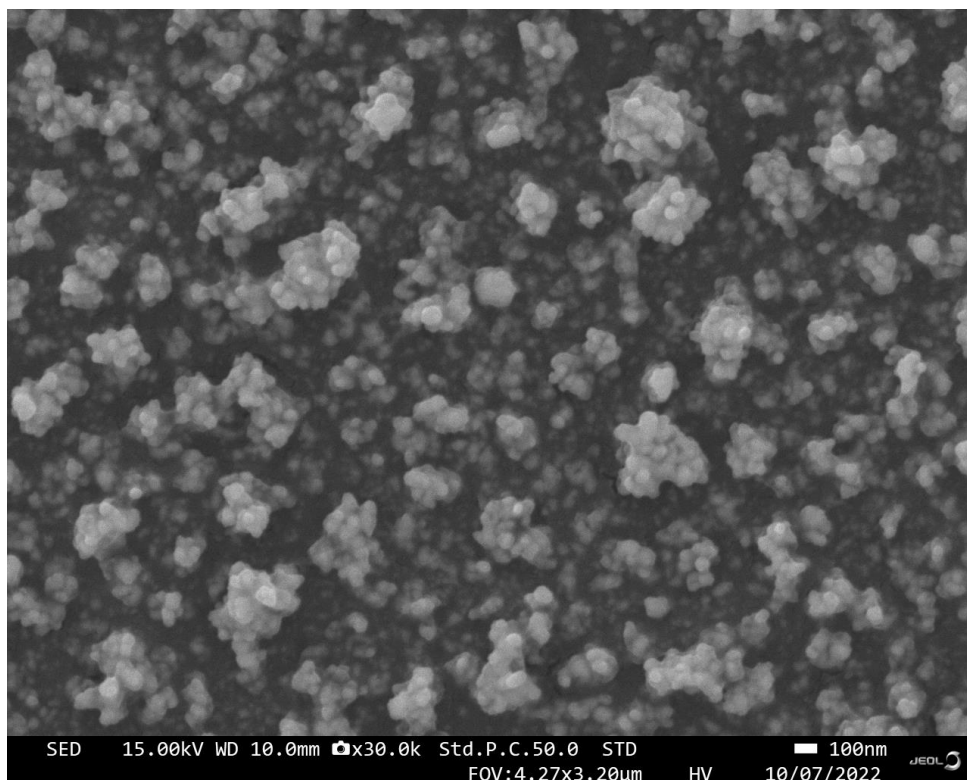

S4: XPS of S3: gold sparked in the magnetic field under ambient air

O 1s:11(3-10-2022)

XPS Spectrum Lens Mode:Hybrid Resolution:Pass energy 20 Iris(Aper):slot(Slot)  
Acqn. Time(s): 121 Sweeps: 2 Anode:Mono(Al (Mono))(150 W) Step(meV): 100.0  
Dwell Time(ms): 261 Charge Neutraliser :On Acquired On :22/10/03 10:05:24

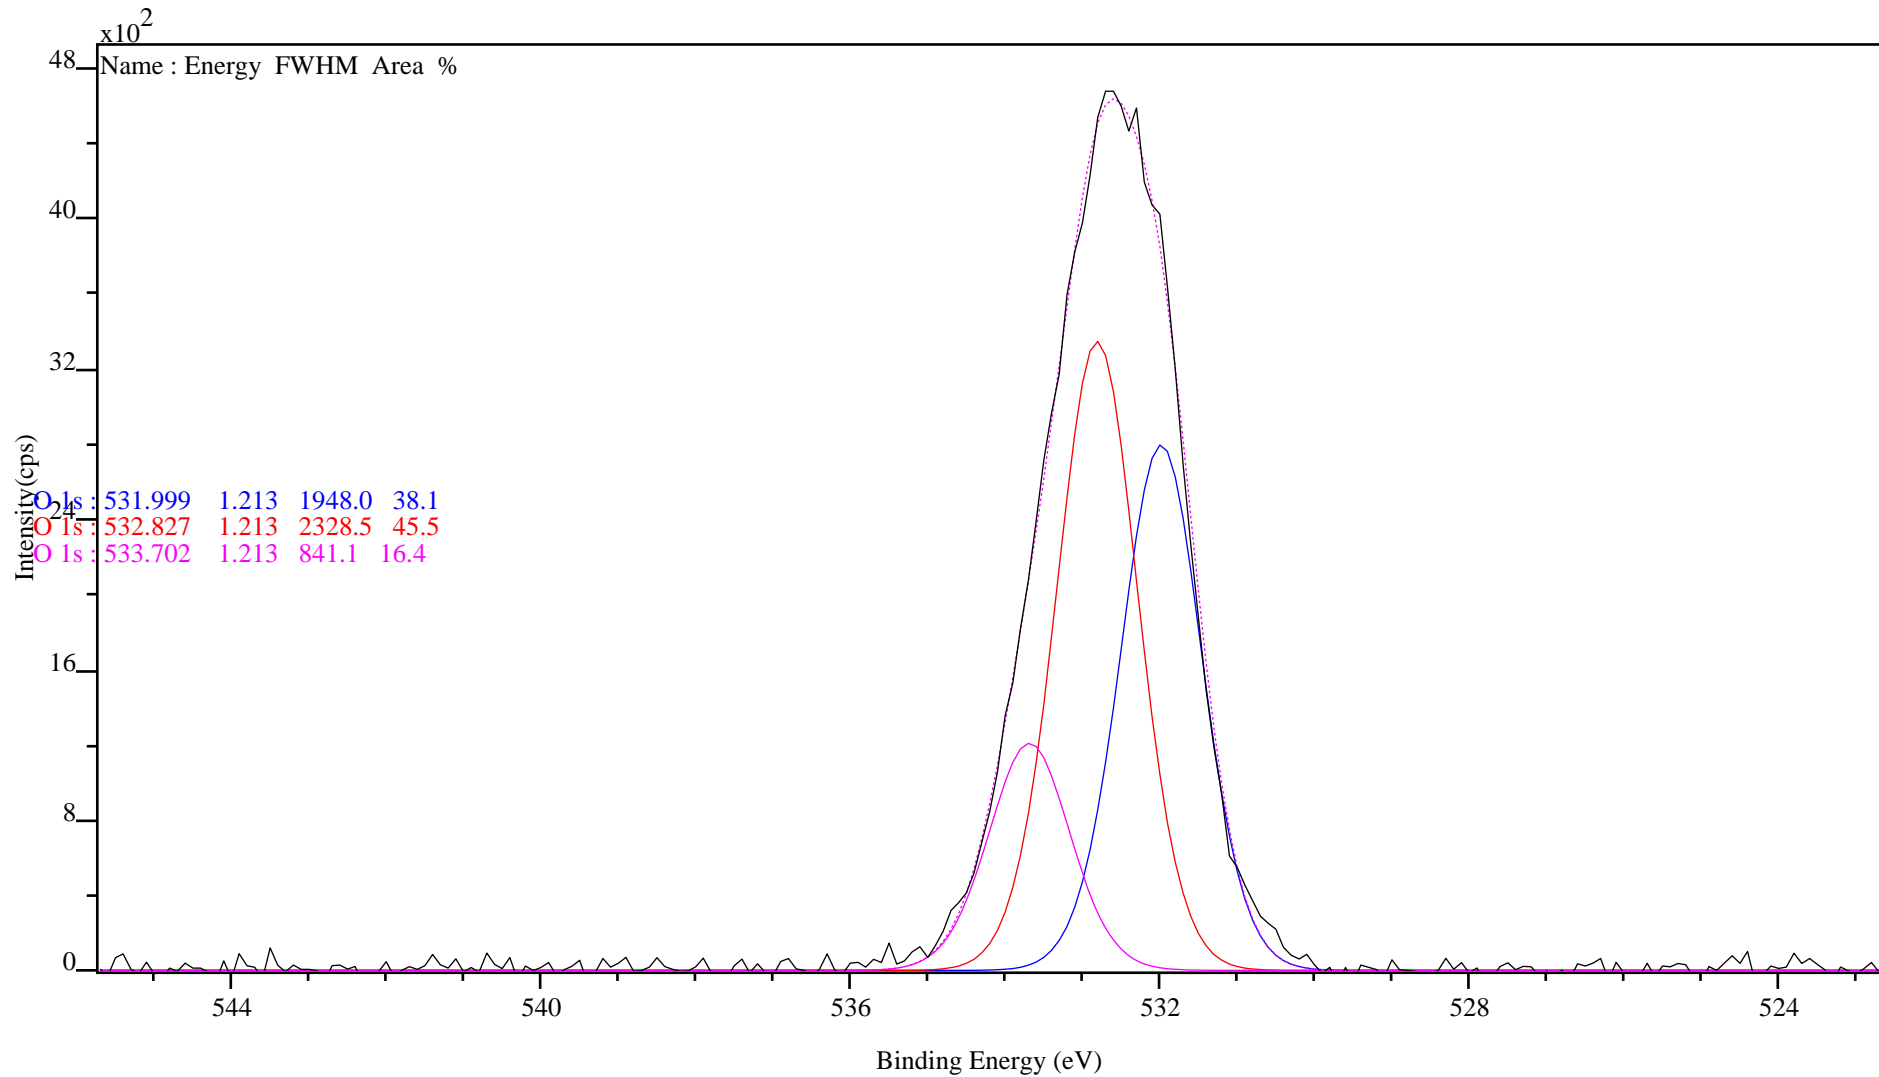

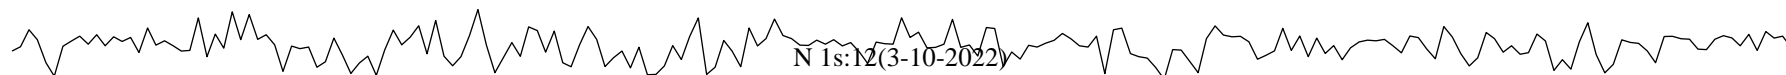

XPS Spectrum Lens Mode:Hybrid Resolution:Pass energy 20 Iris(Aper):slot(Slot)  
Acqn. Time(s): 121 Sweeps: 2 Anode:Mono(Al (Mono))(150 W) Step(meV): 100.0  
Dwell Time(ms): 286 Charge Neutraliser :On Acquired On :22/10/03 10:05:24

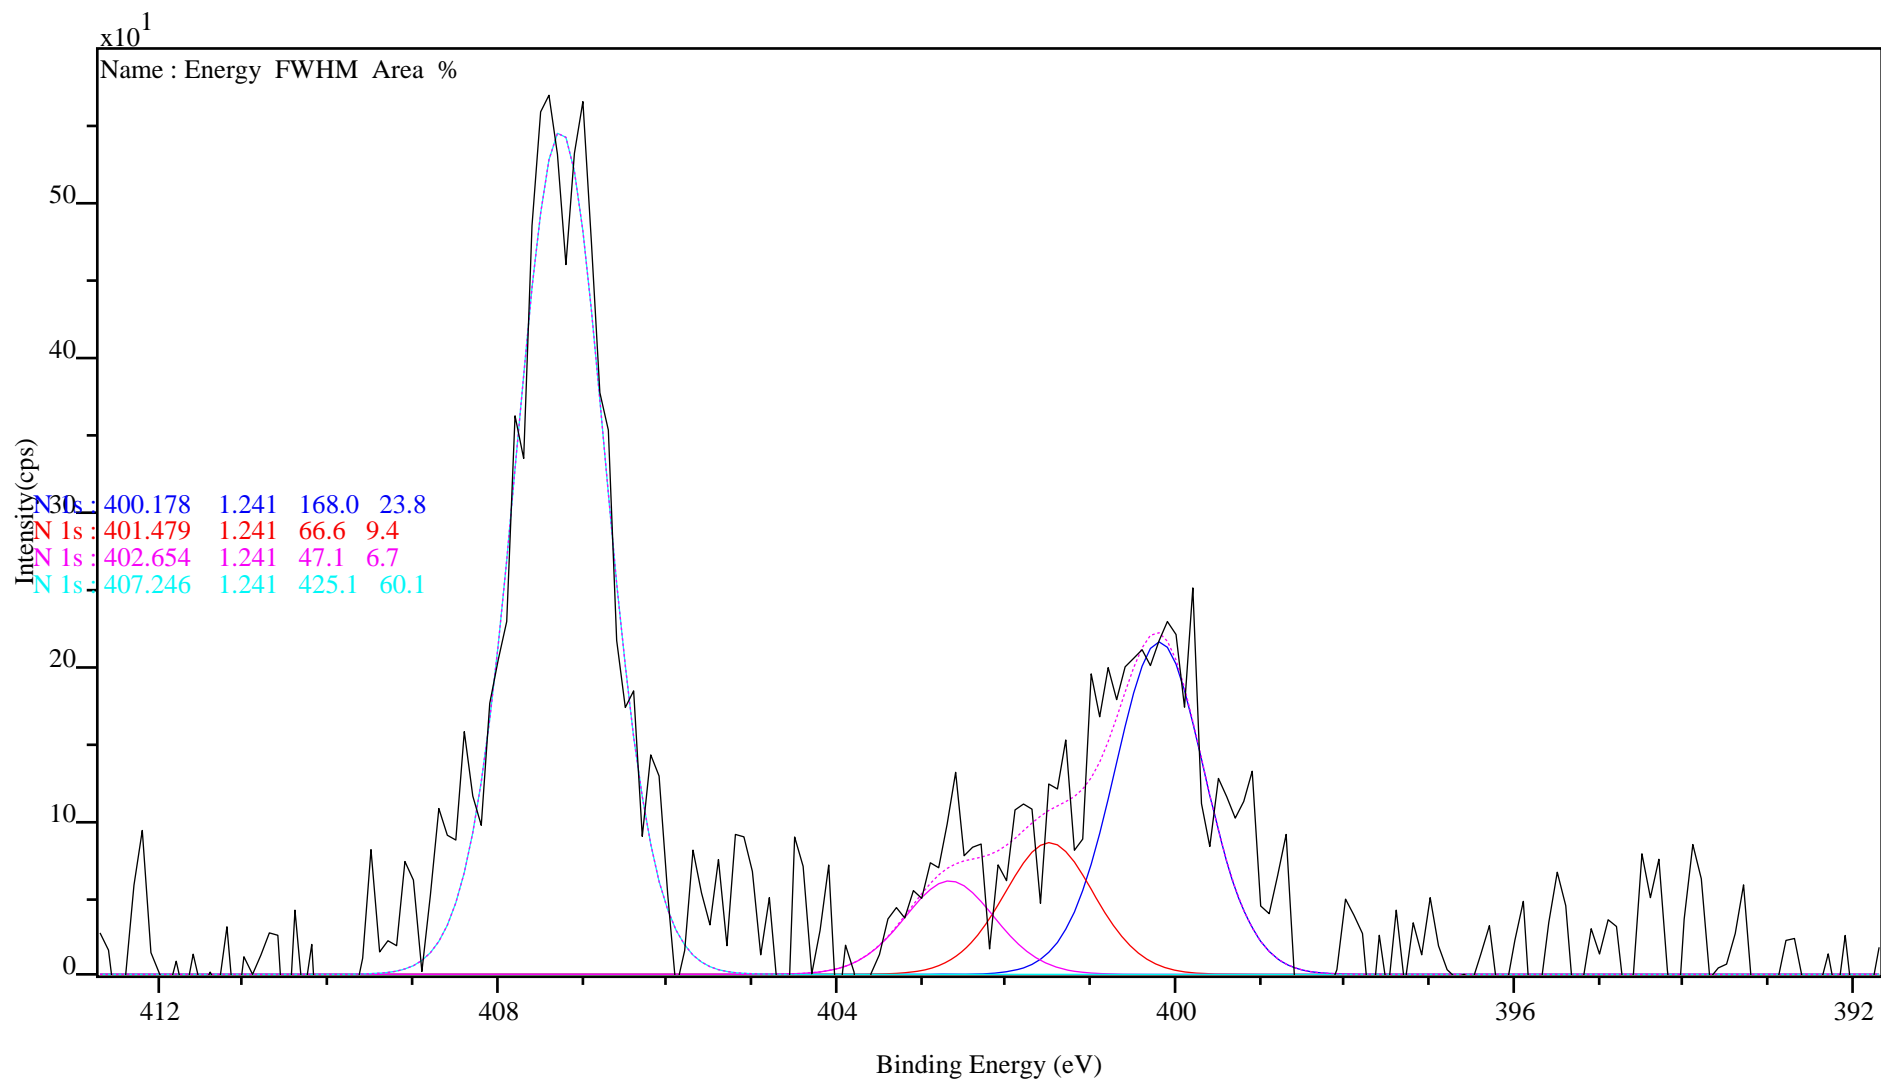

C 1s:13(3-10-2022)

XPS Spectrum Lens Mode:Hybrid Resolution:Pass energy 20 Iris(Aper):slot(Slot)  
Acqn. Time(s): 120 Sweeps: 2 Anode:Mono(Al (Mono))(150 W) Step(meV): 100.0  
Dwell Time(ms): 250 Charge Neutraliser :On Acquired On :22/10/03 10:05:24

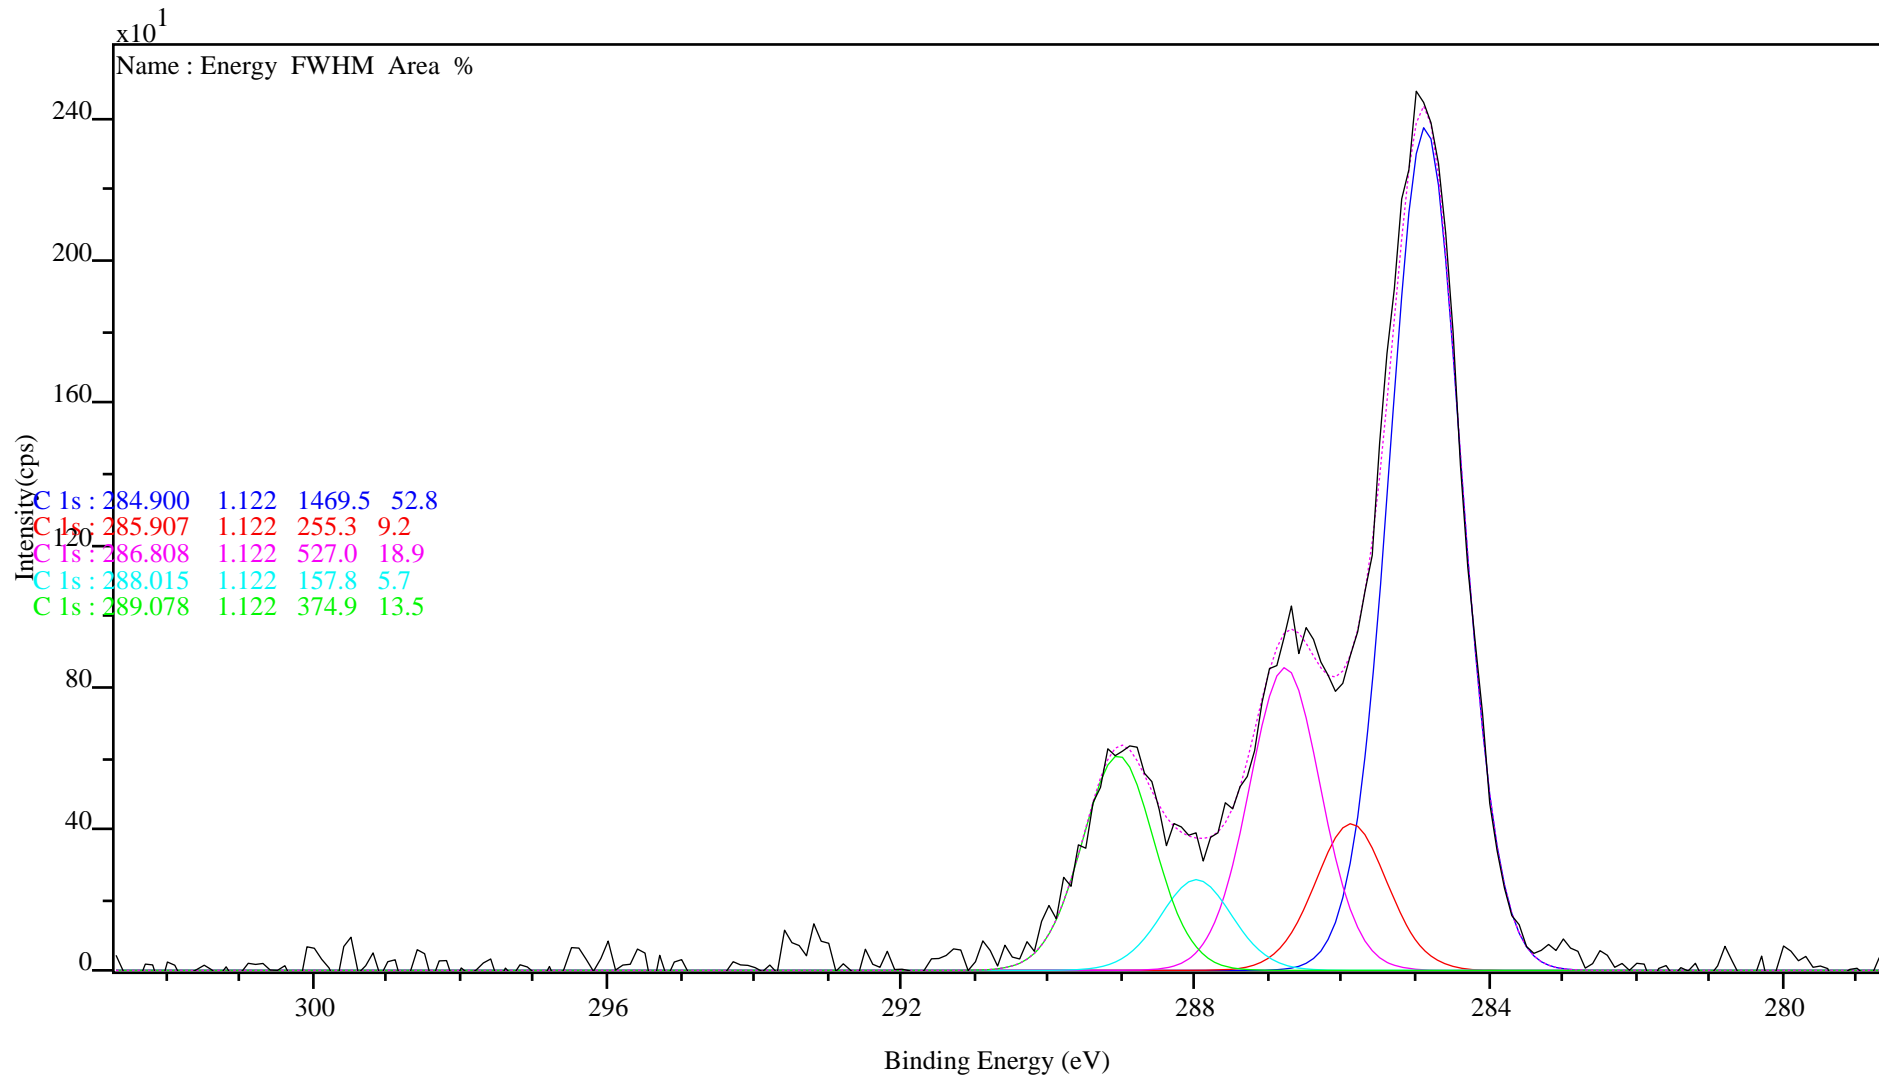

Au 4f:14(3-10-2022)

XPS Spectrum Lens Mode:Hybrid Resolution:Pass energy 20 Iris(Aper):slot(Slot)  
Acqn. Time(s): 121 Sweeps: 2 Anode:Mono(Al (Mono))(150 W) Step(meV): 100.0  
Dwell Time(ms): 400 Charge Neutraliser :On Acquired On :22/10/03 10:05:24

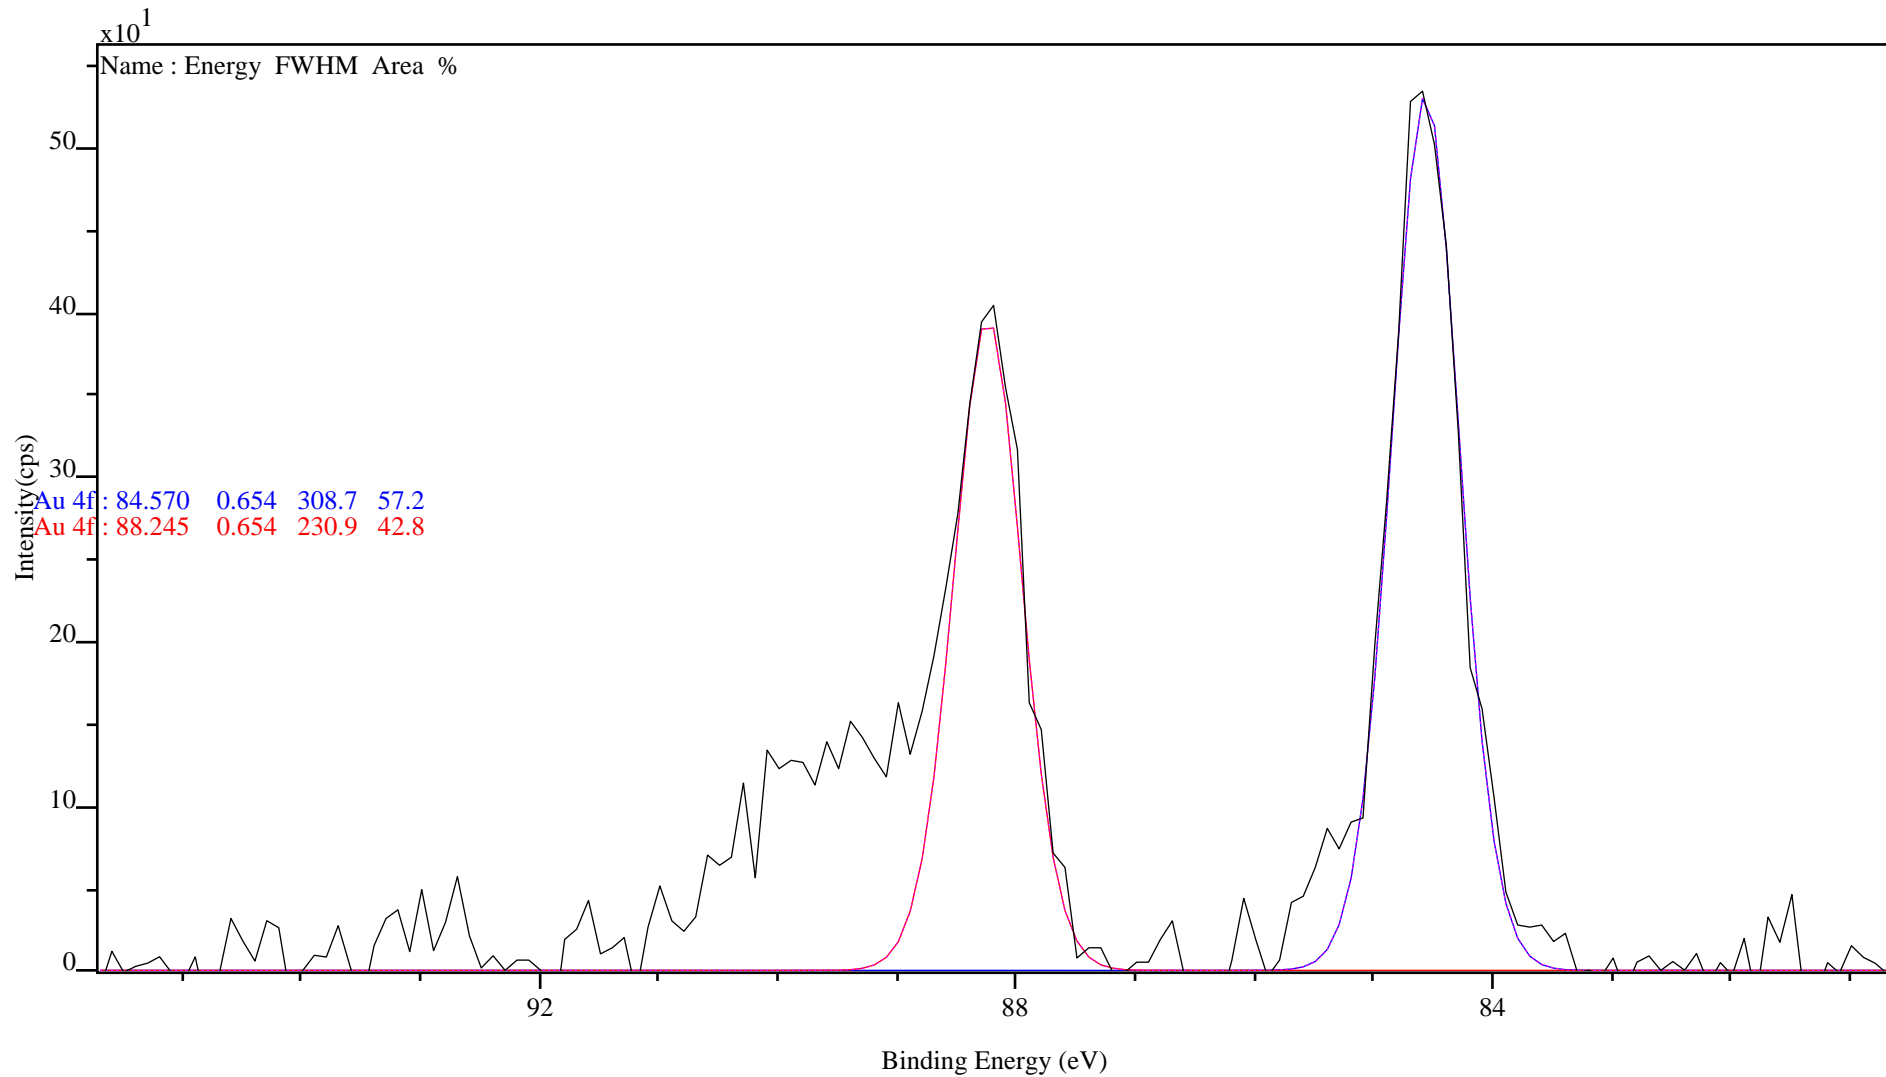

Valence:15(3-10-2022)

XPS Spectrum Lens Mode:Hybrid Resolution:Pass energy 20 Iris(Aperture):slot(Slot)  
Acqn. Time(s): 121 Sweeps: 2 Anode:Mono(Al (Mono))(150 W) Step(meV): 100.0  
Dwell Time(ms): 300 Charge Neutraliser :On Acquired On :22/10/03 10:05:24

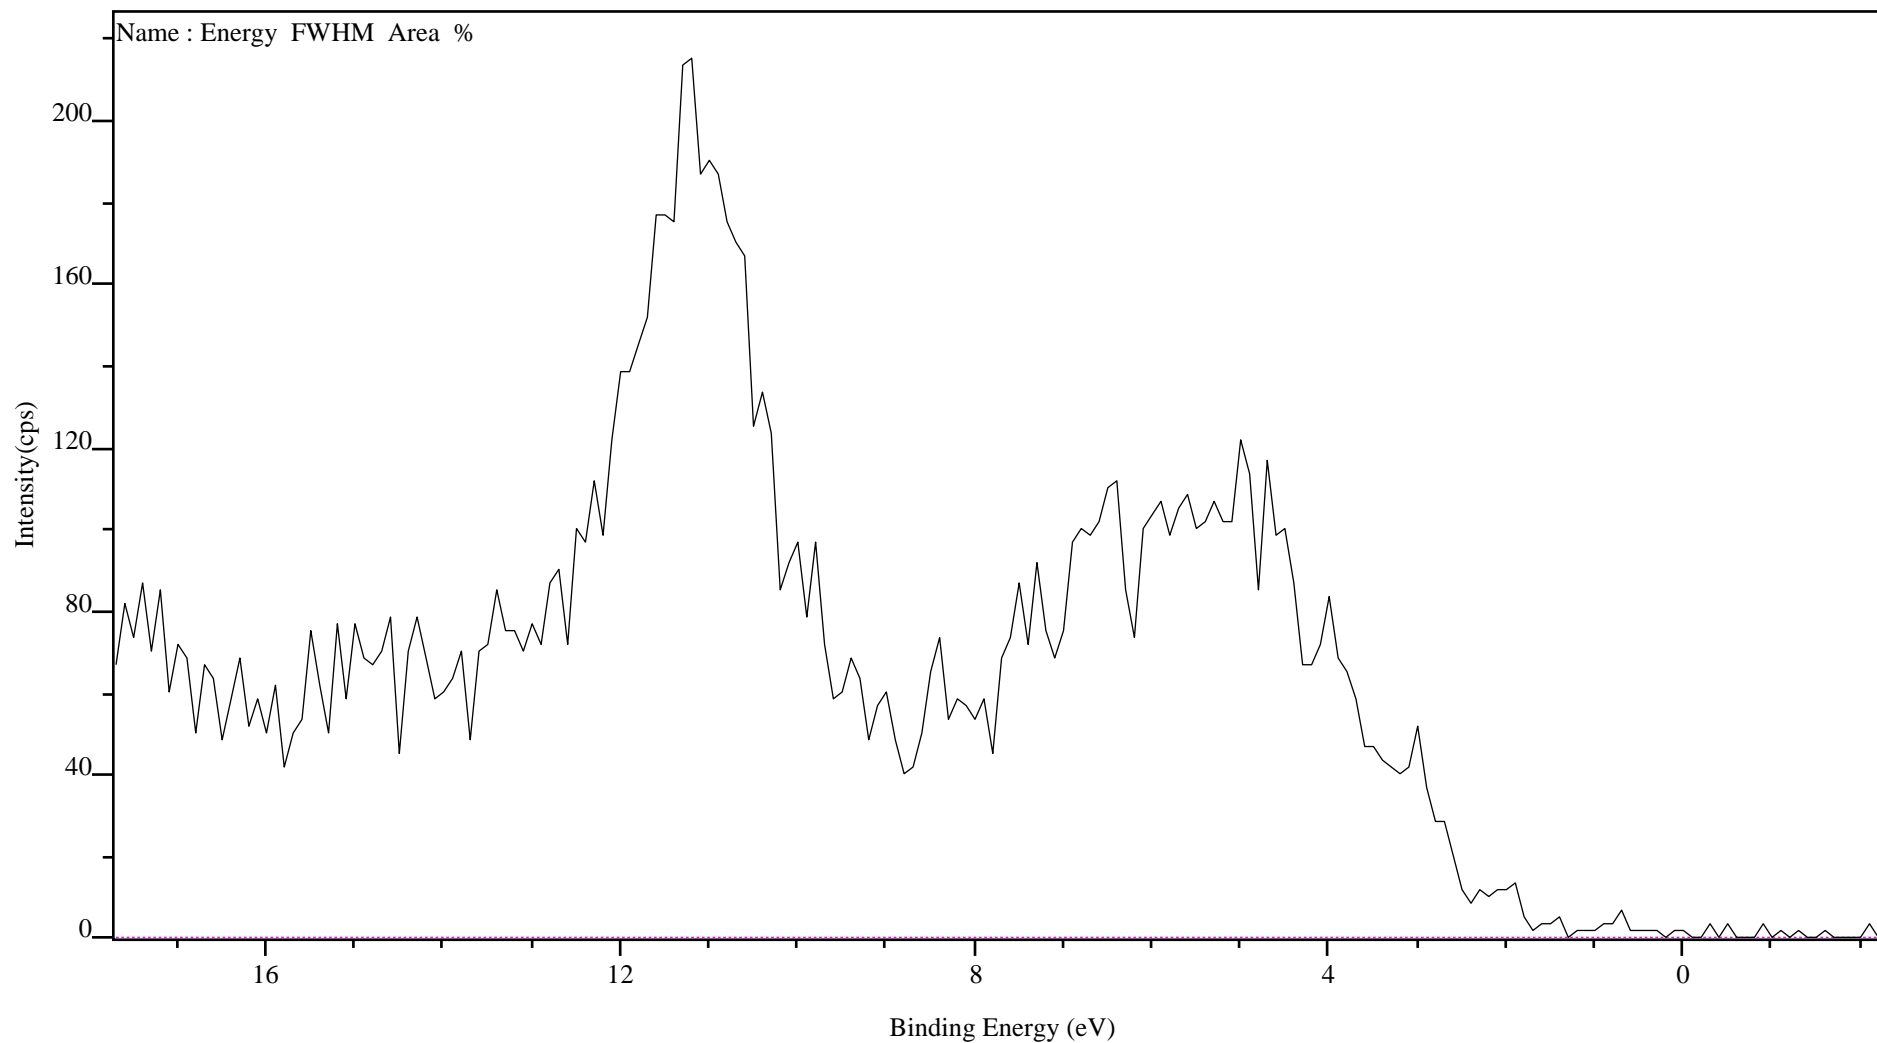



wide:10(3-10-2022)  
XPS Spectrum Lens Mode:Hybrid Resolution:Pass energy 80 Iris(Aper):slot(Slot)  
Acqn. Time(s): 121 Sweeps: 1 Anode:Mono(Al (Mono))(150 W) Step(meV): 1000.0  
Dwell Time(ms): 100 Charge Neutraliser :On Acquired On :22/10/03 10:02:27

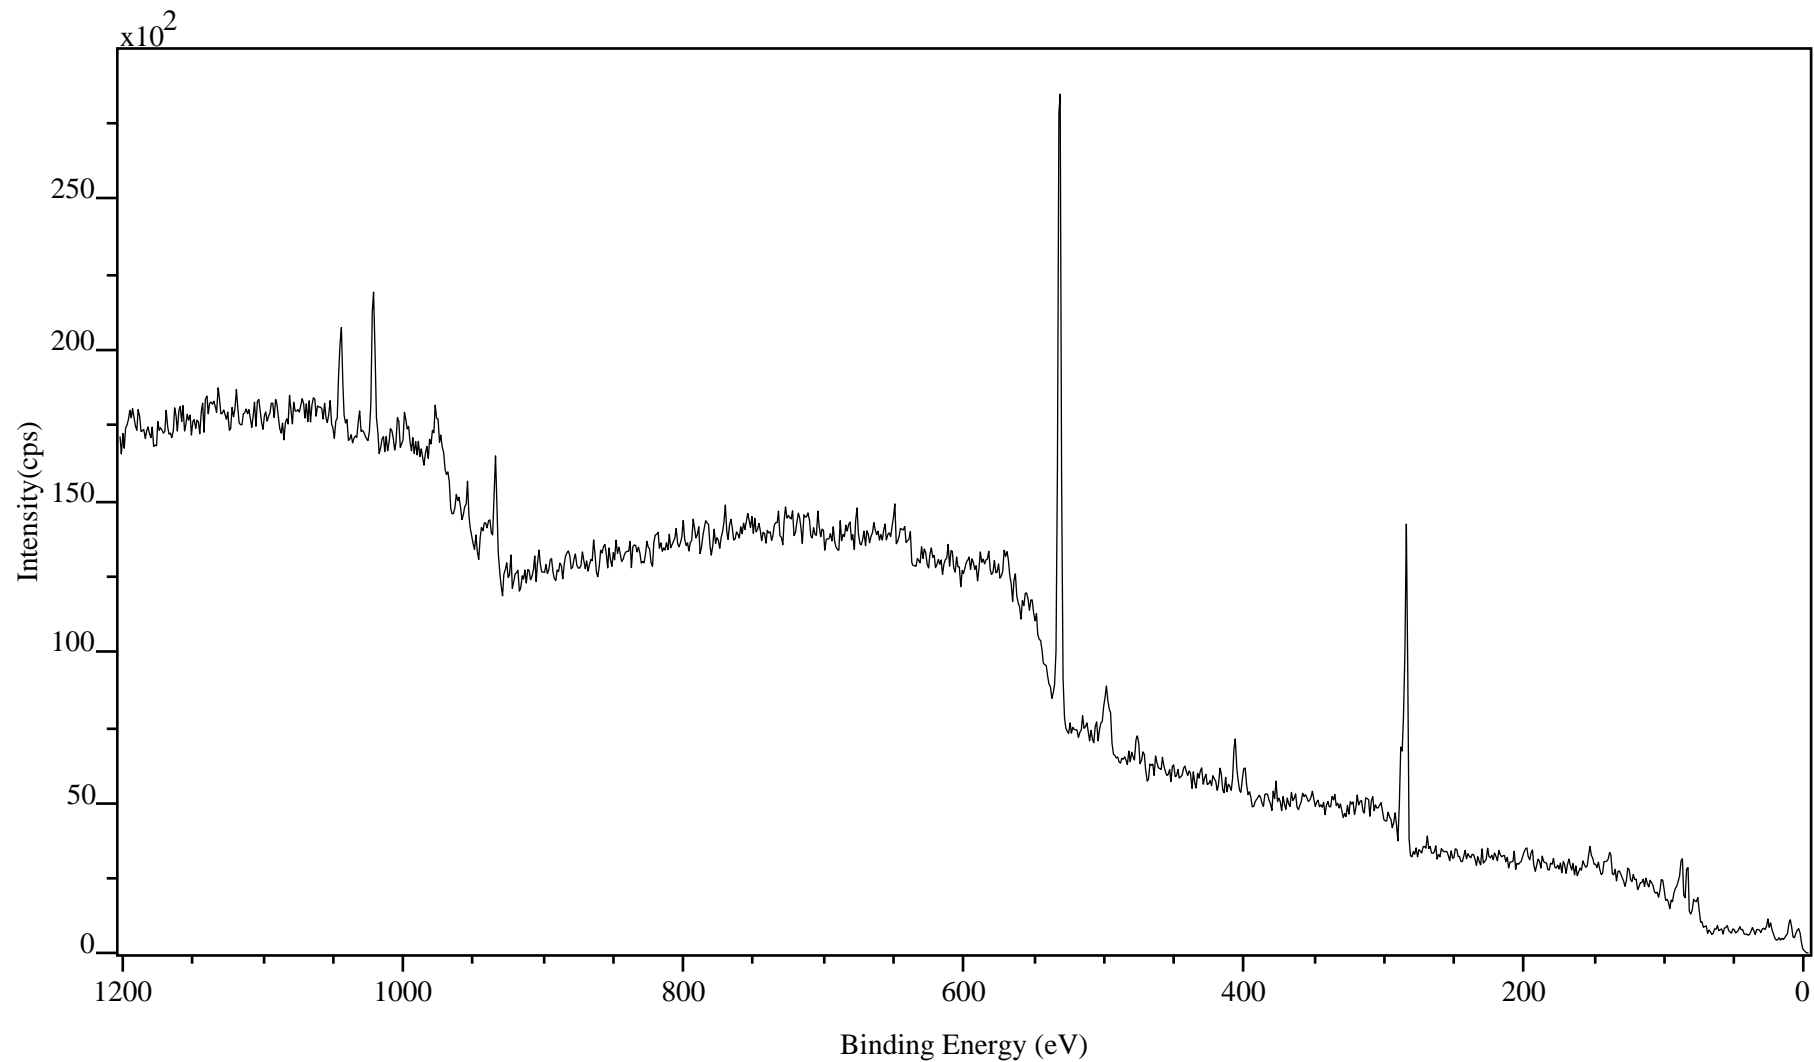

S5 sparked gold in nitrogen flow without magnetic field

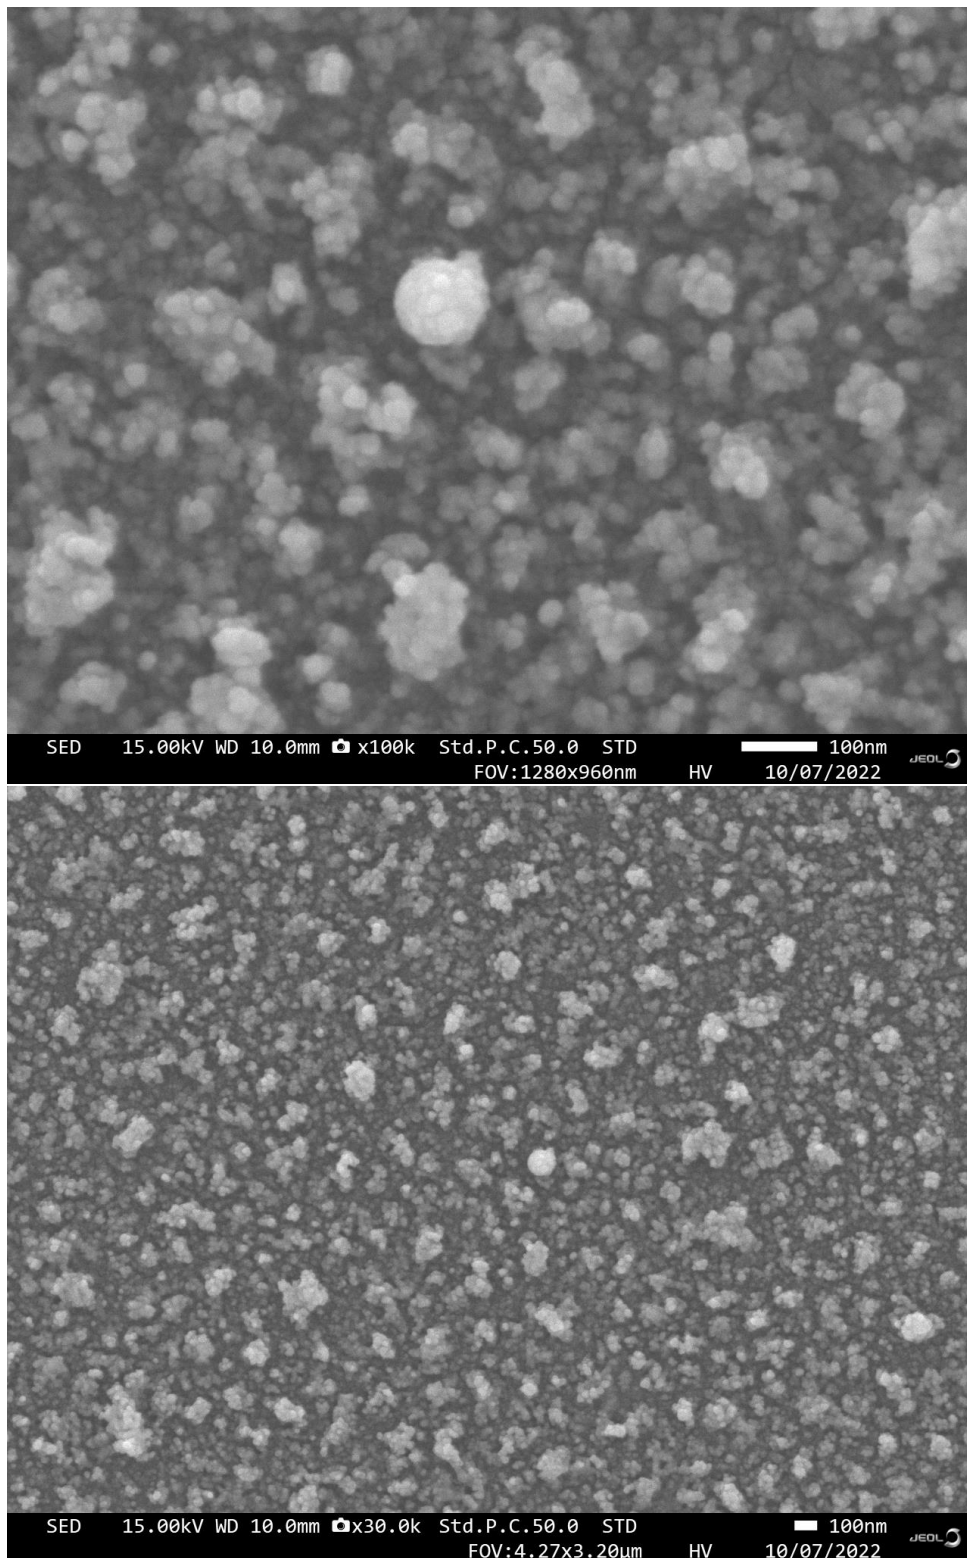

S5 sparked gold in nitrogen flow without magnetic field

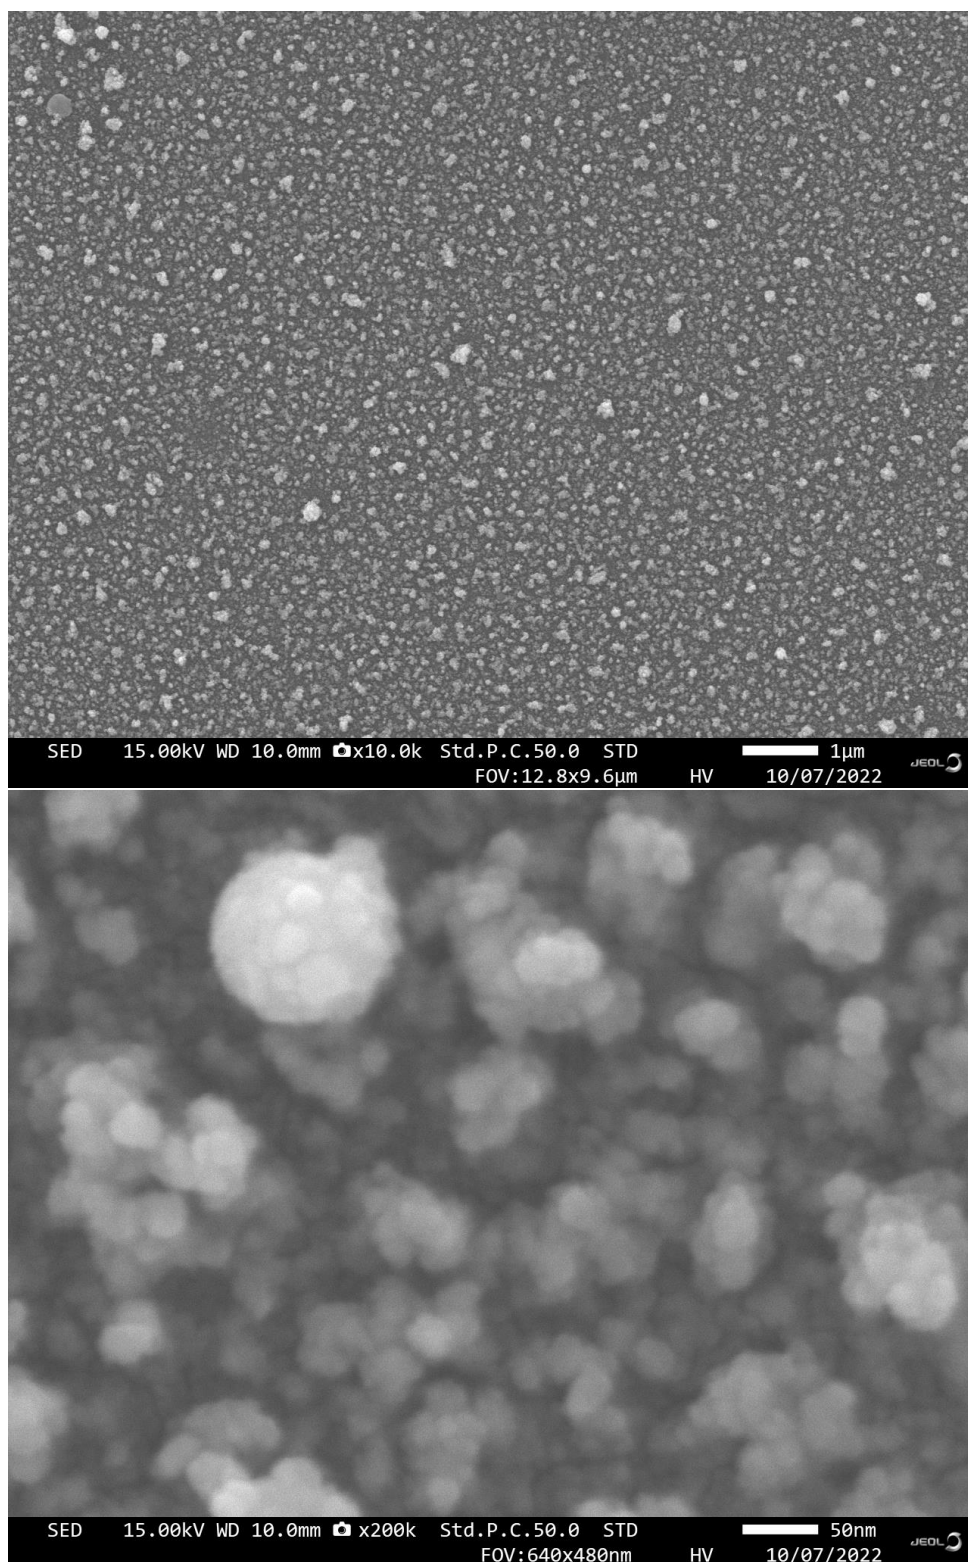

S6 XPS of sparked gold in nitrogen flow without magnetic field

O 1s:19(3-10-2022)

XPS Spectrum Lens Mode:Hybrid Resolution:Pass energy 20 Iris(Aper):slot(Slot)  
Acqn. Time(s): 121 Sweeps: 2 Anode:Mono(Al (Mono))(150 W) Step(meV): 100.0  
Dwell Time(ms): 261 Charge Neutraliser :On Acquired On :22/10/03 10:21:06

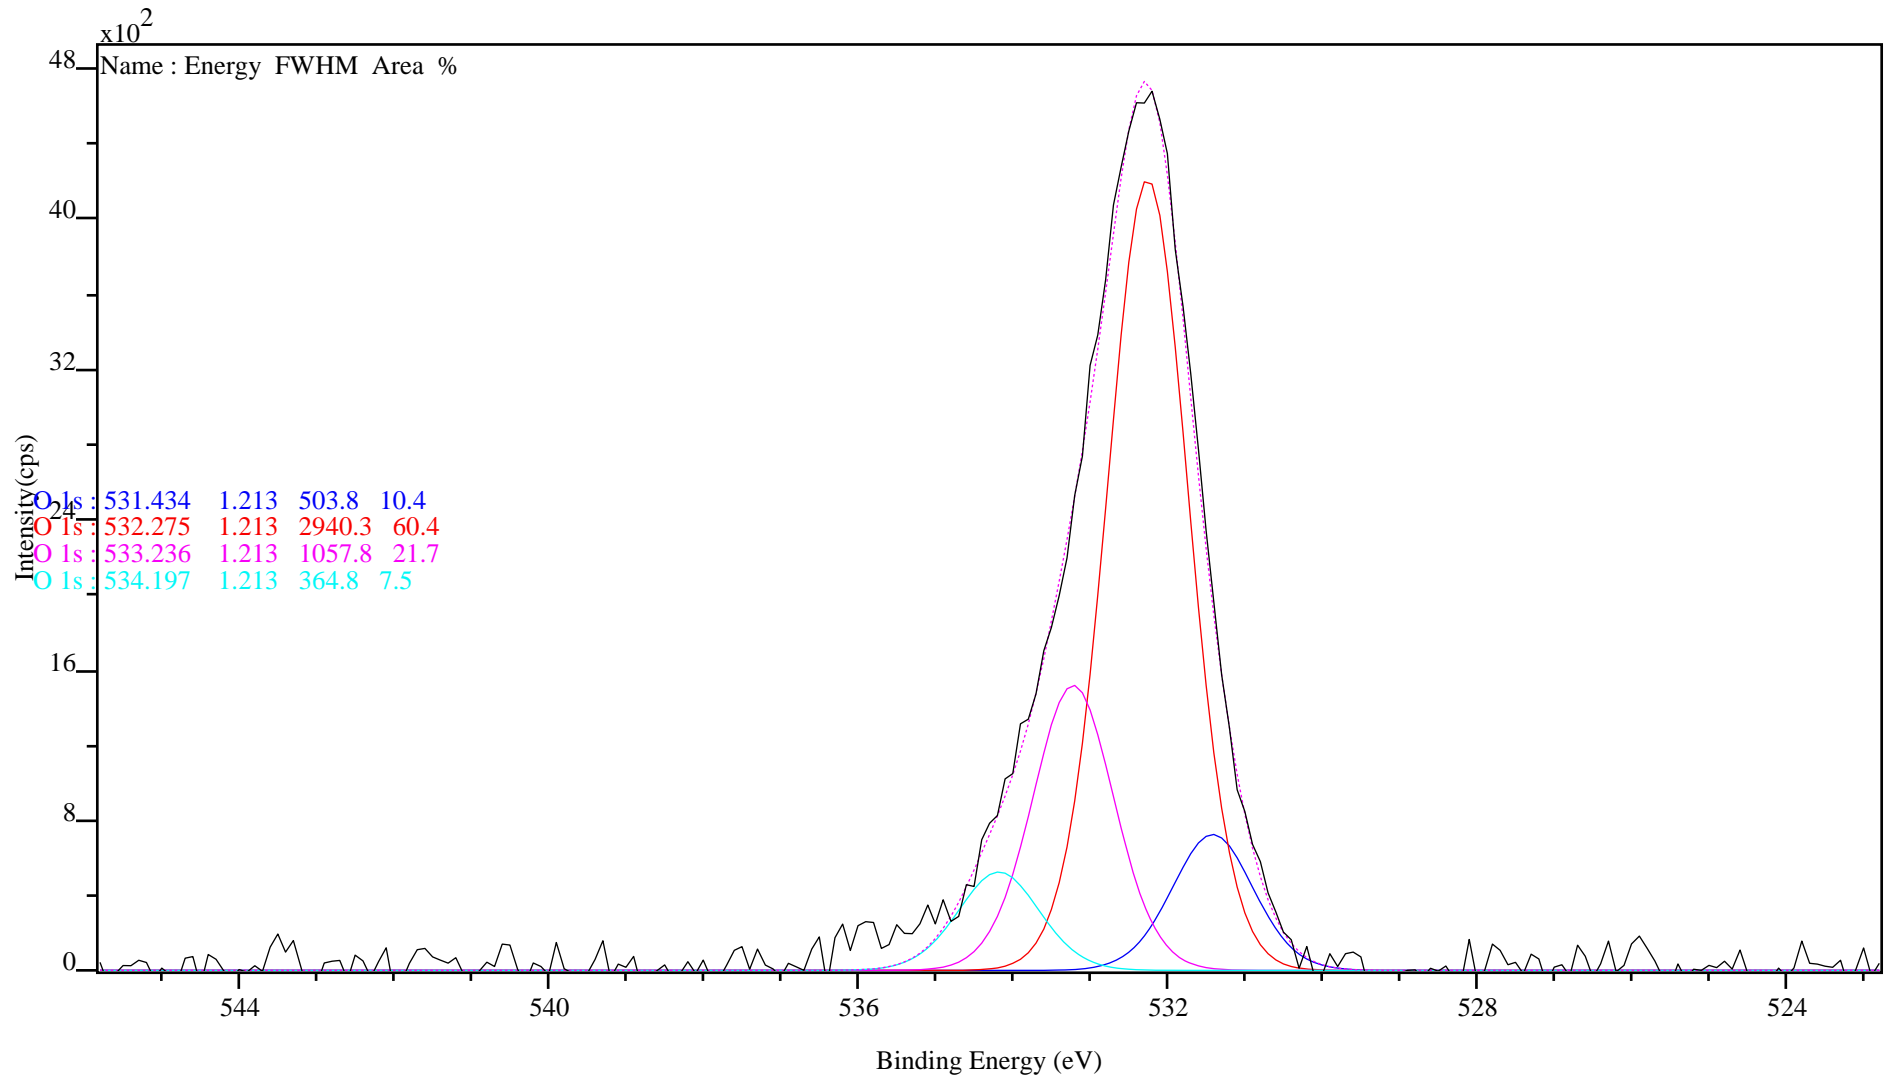

N 1s: 2003-10-2022)  
XPS Spectrum Lens Mode:Hybrid Resolution:Pass energy 20 Iris(Aper):slot(Slot)  
Acqn. Time(s): 121 Sweeps: 2 Anode:Mono(Al (Mono))(150 W) Step(meV): 100.0  
Dwell Time(ms): 286 Charge Neutraliser :On Acquired On :22/10/03 10:21:06

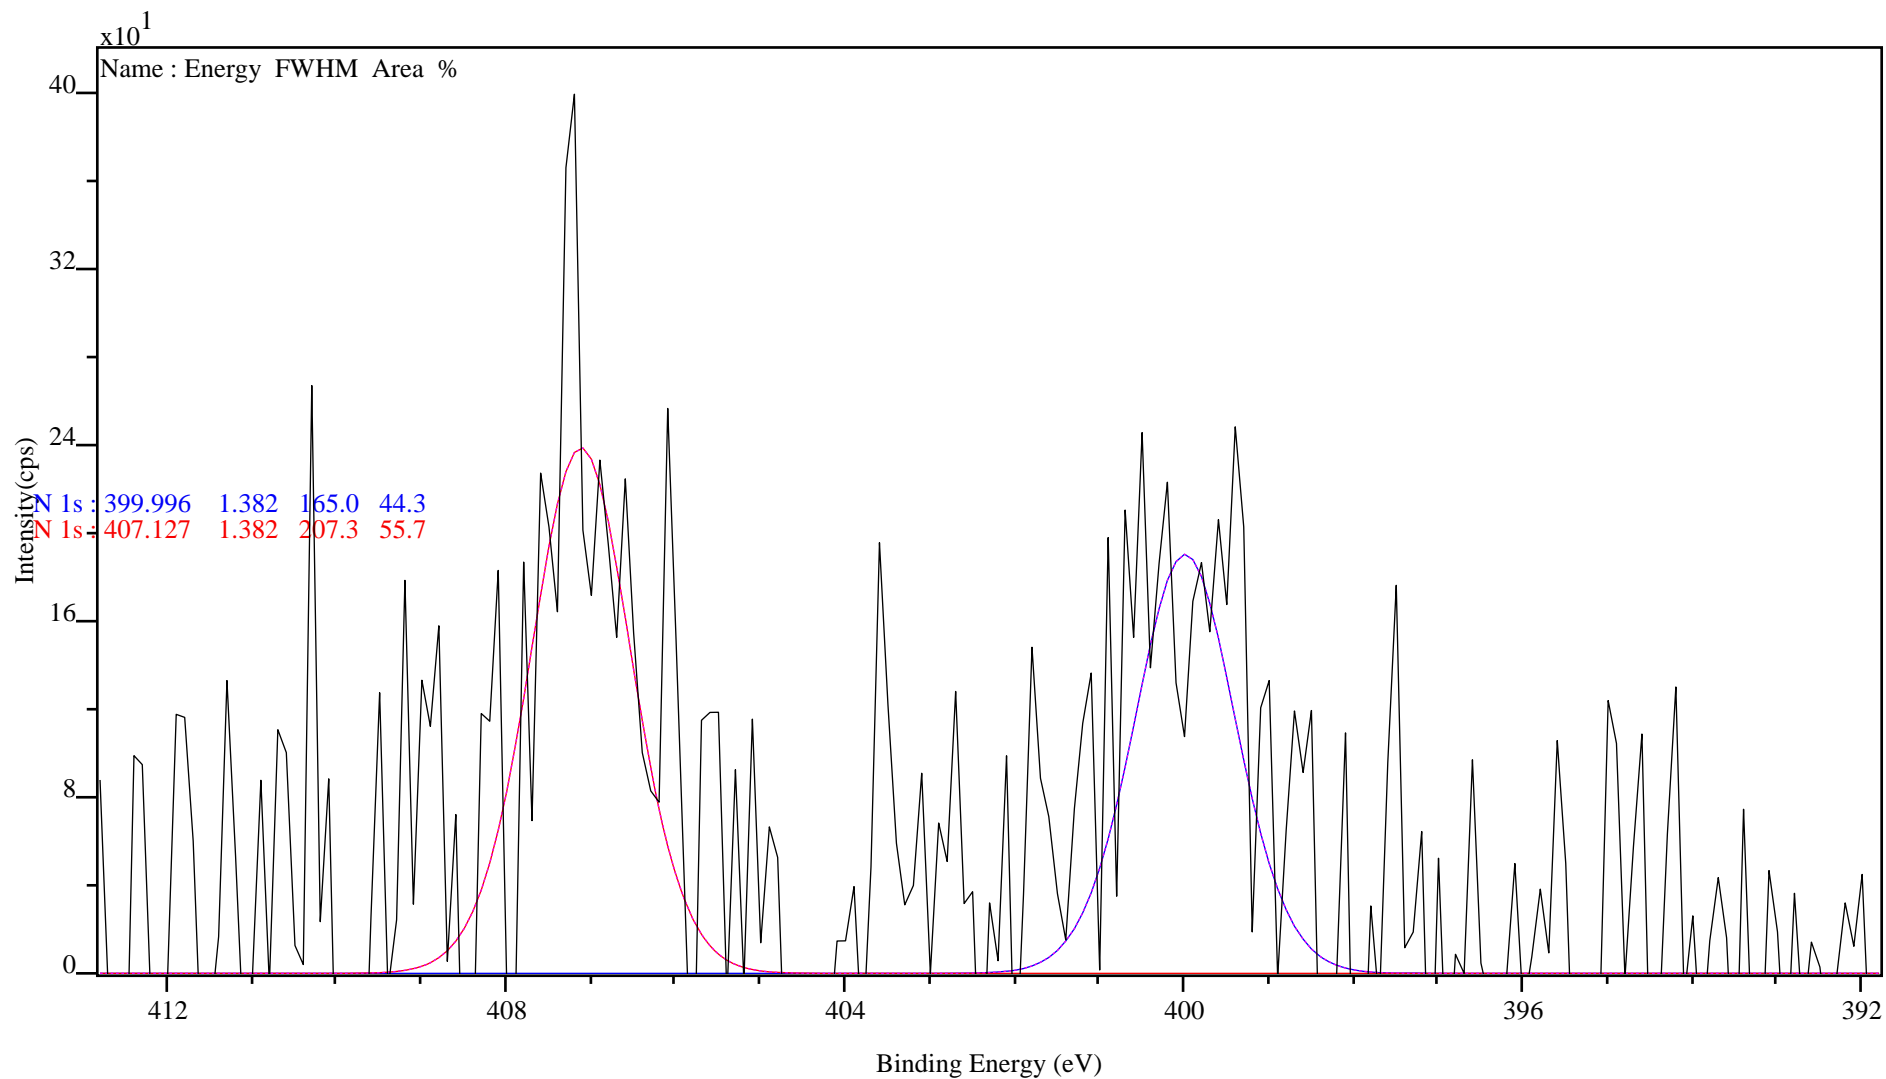

C 1s:21(3-10-2022)

XPS Spectrum Lens Mode:Hybrid Resolution:Pass energy 20 Iris(Aper):slot(Slot)  
Acqn. Time(s): 120 Sweeps: 2 Anode:Mono(Al (Mono))(150 W) Step(meV): 100.0  
Dwell Time(ms): 250 Charge Neutraliser :On Acquired On :22/10/03 10:21:06

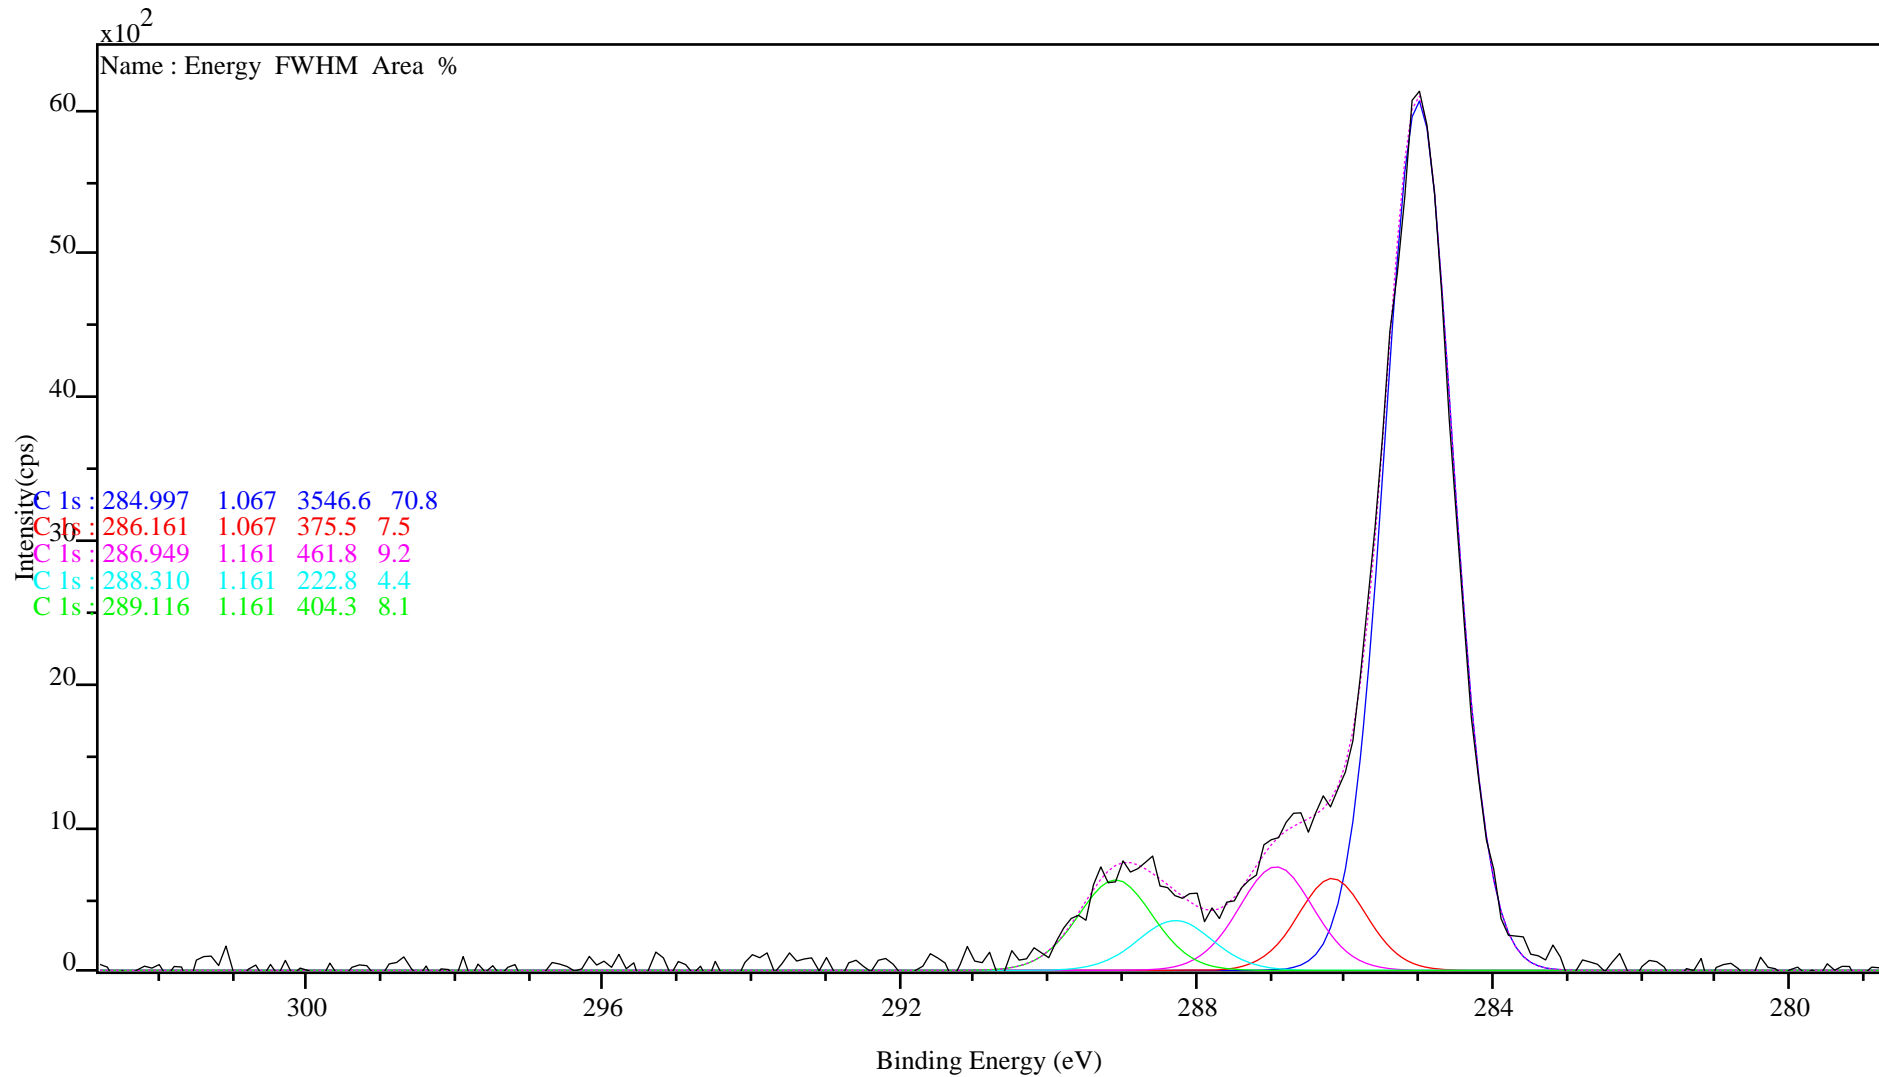

Au 4f:22(3-10-2022)

XPS Spectrum Lens Mode:Hybrid Resolution:Pass energy 20 Iris(Aper):slot(Slot)  
Acqn. Time(s): 121 Sweeps: 2 Anode:Mono(Al (Mono))(150 W) Step(meV): 100.0  
Dwell Time(ms): 400 Charge Neutraliser :On Acquired On :22/10/03 10:21:06

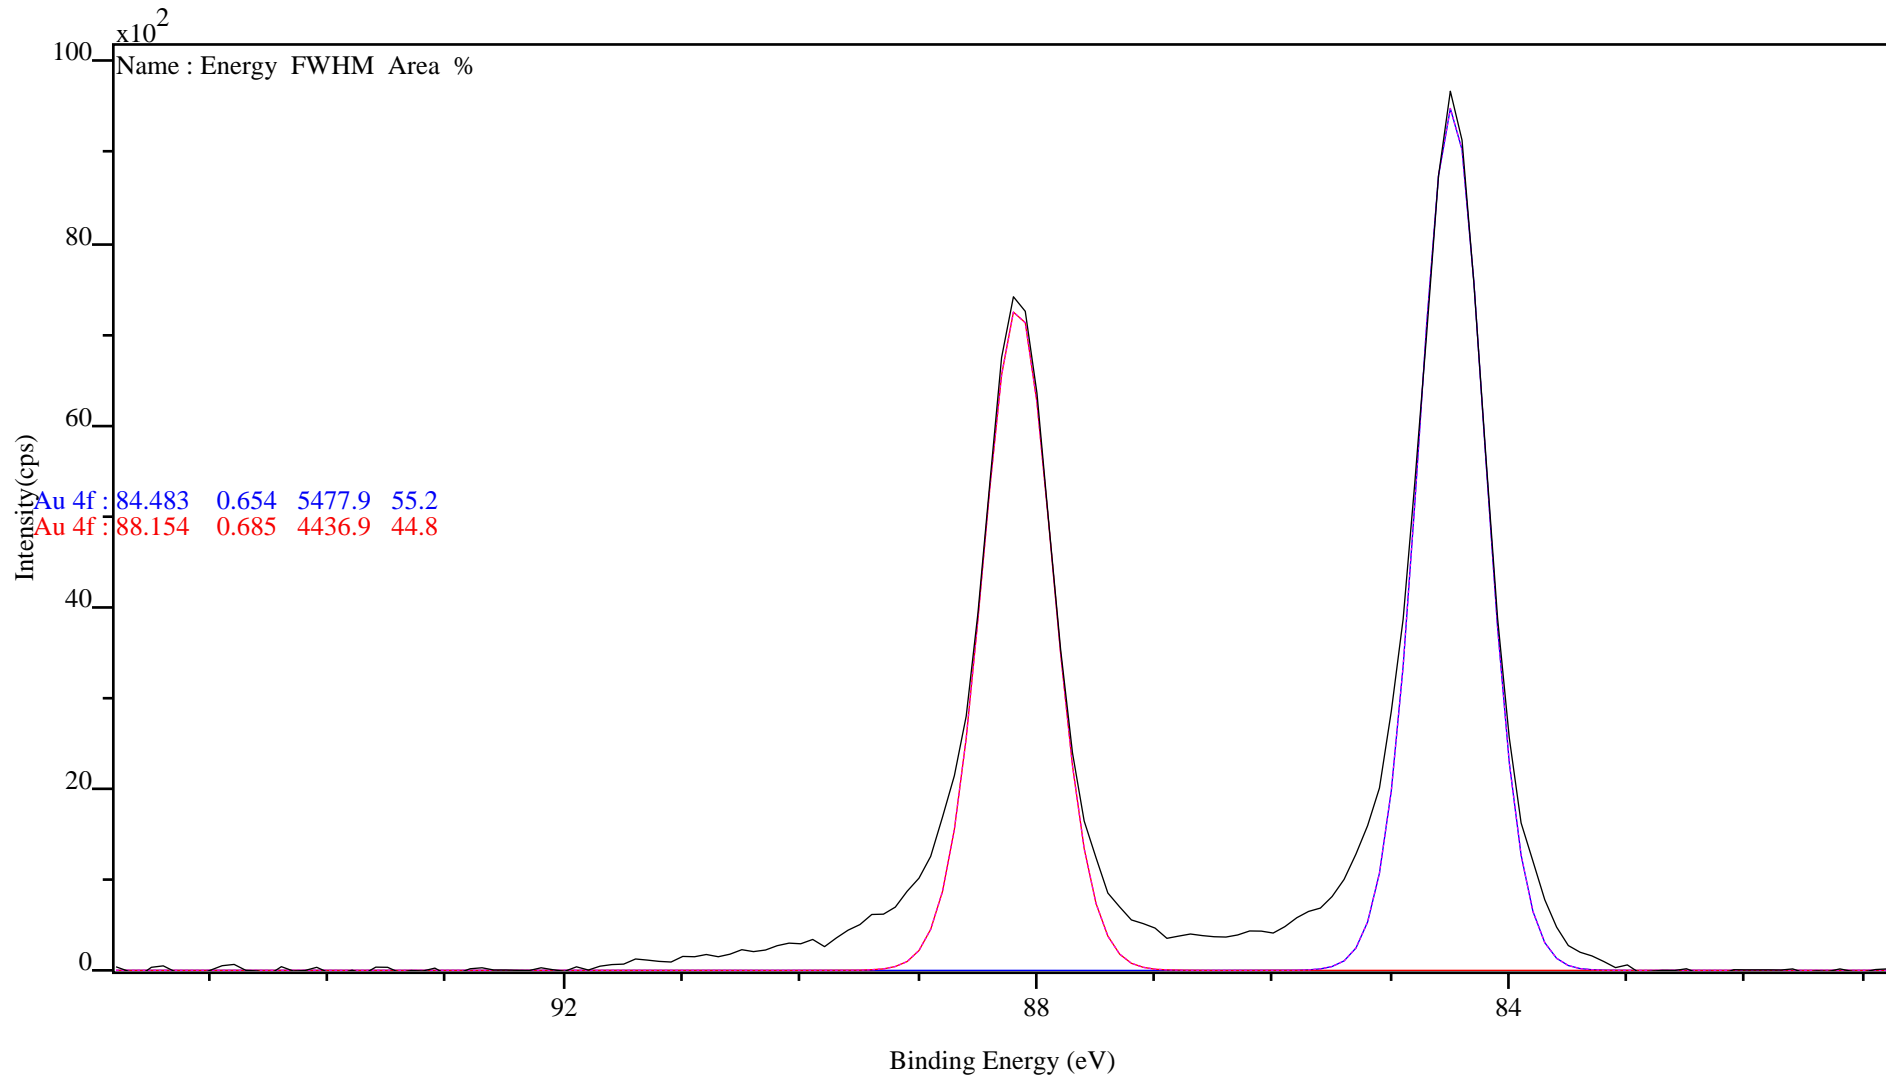

Valence:23(3-10-2022)

XPS Spectrum Lens Mode:Hybrid Resolution:Pass energy 20 Iris(Aper):slot(Slot)  
Acqn. Time(s): 121 Sweeps: 2 Anode:Mono(Al (Mono))(150 W) Step(meV): 100.0  
Dwell Time(ms): 300 Charge Neutraliser :On Acquired On :22/10/03 10:21:06

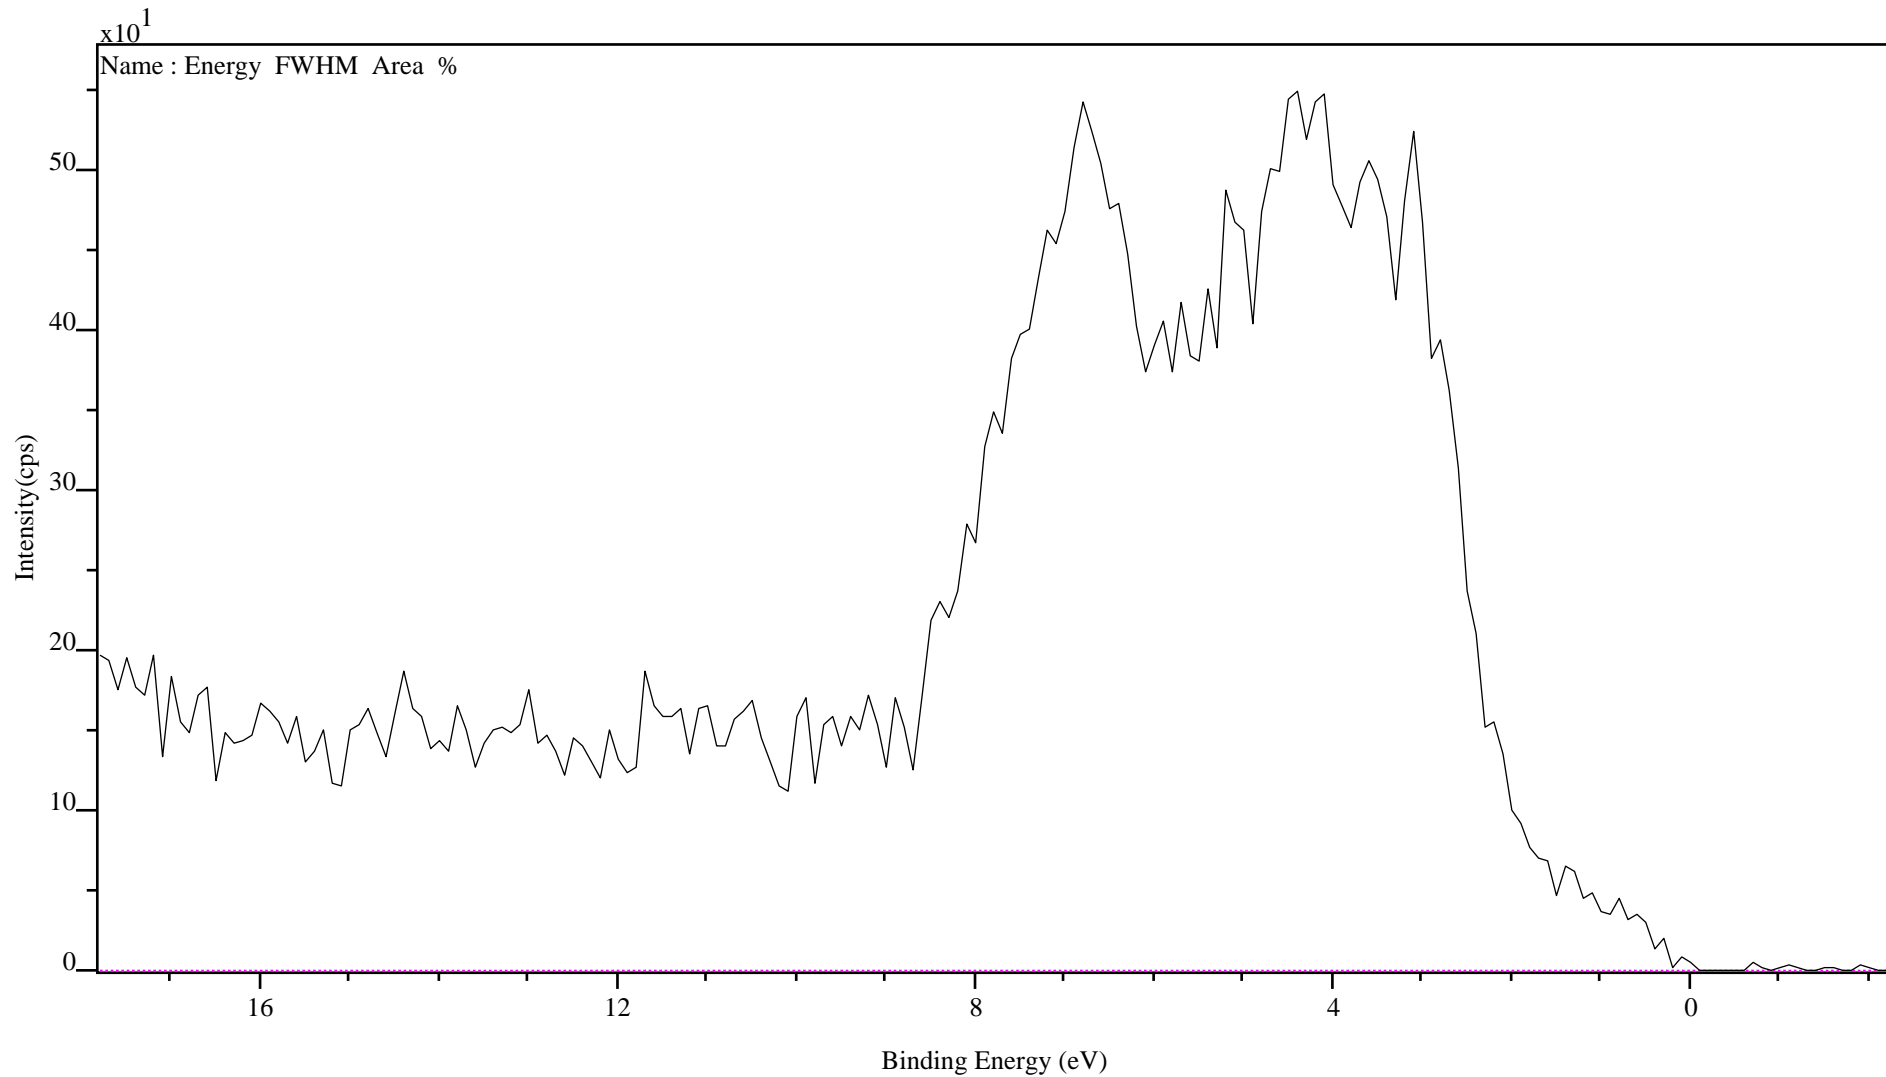



wide:18(3-10-2022)  
XPS Spectrum Lens Mode:Hybrid Resolution:Pass energy 80 Iris(Aper):slot(Slot)  
Acqn. Time(s): 121 Sweeps: 1 Anode:Mono(Al (Mono))(150 W) Step(meV): 1000.0  
Dwell Time(ms): 100 Charge Neutraliser :On Acquired On :22/10/03 10:18:10

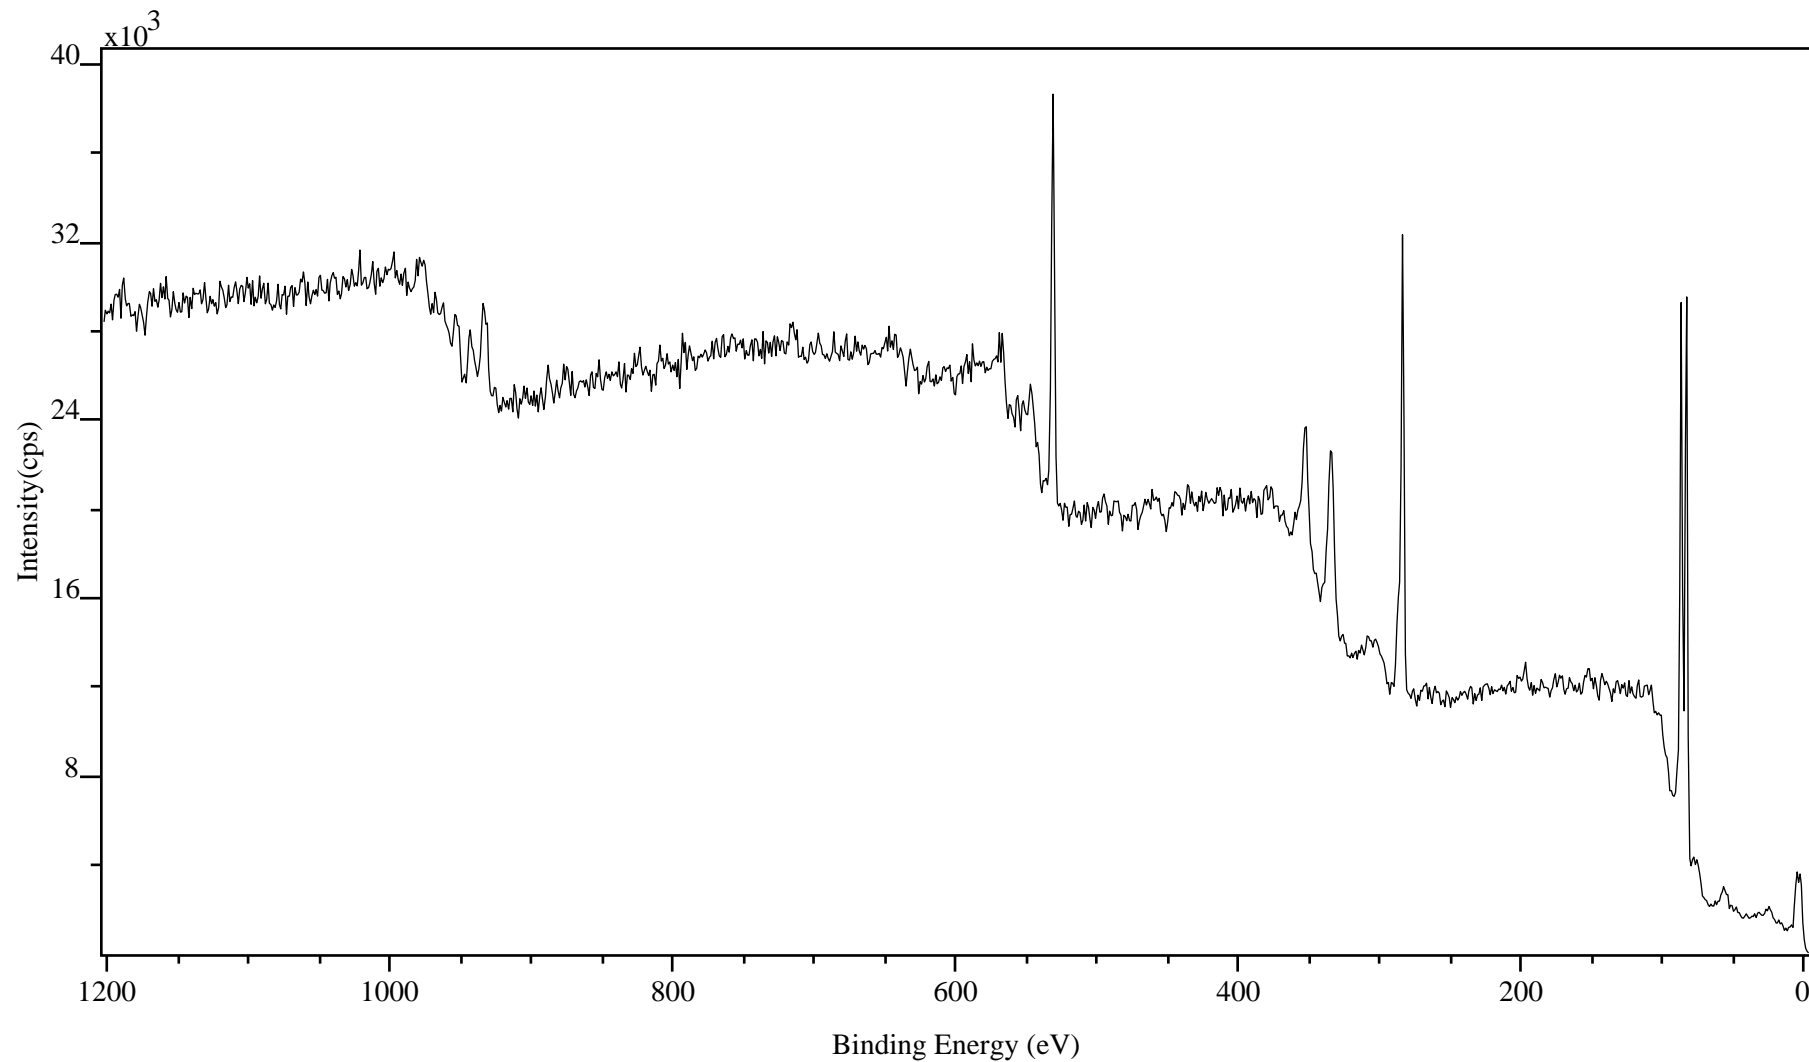

S7 sparked gold in nitrogen flow with magnetic field

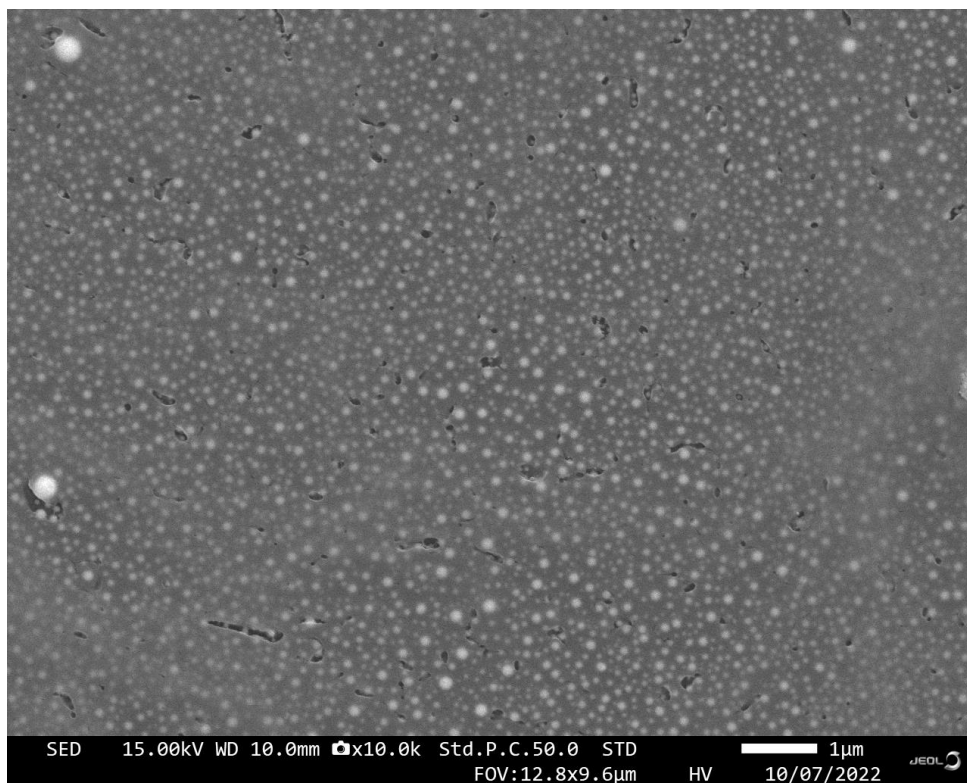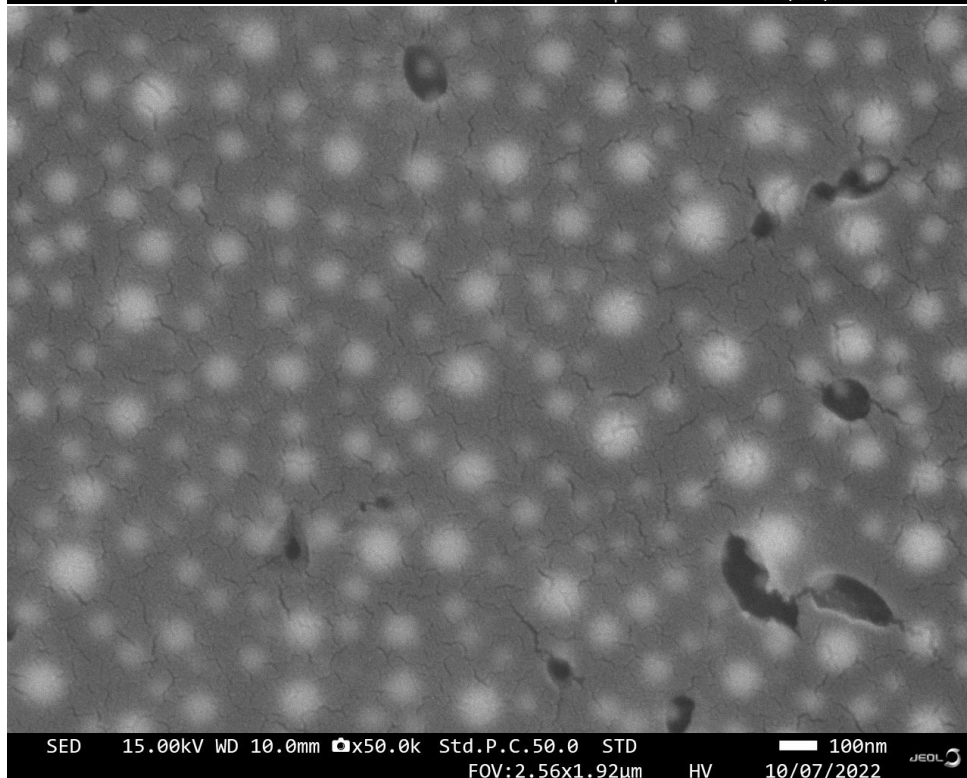

S7 sparked gold in nitrogen flow with magnetic field

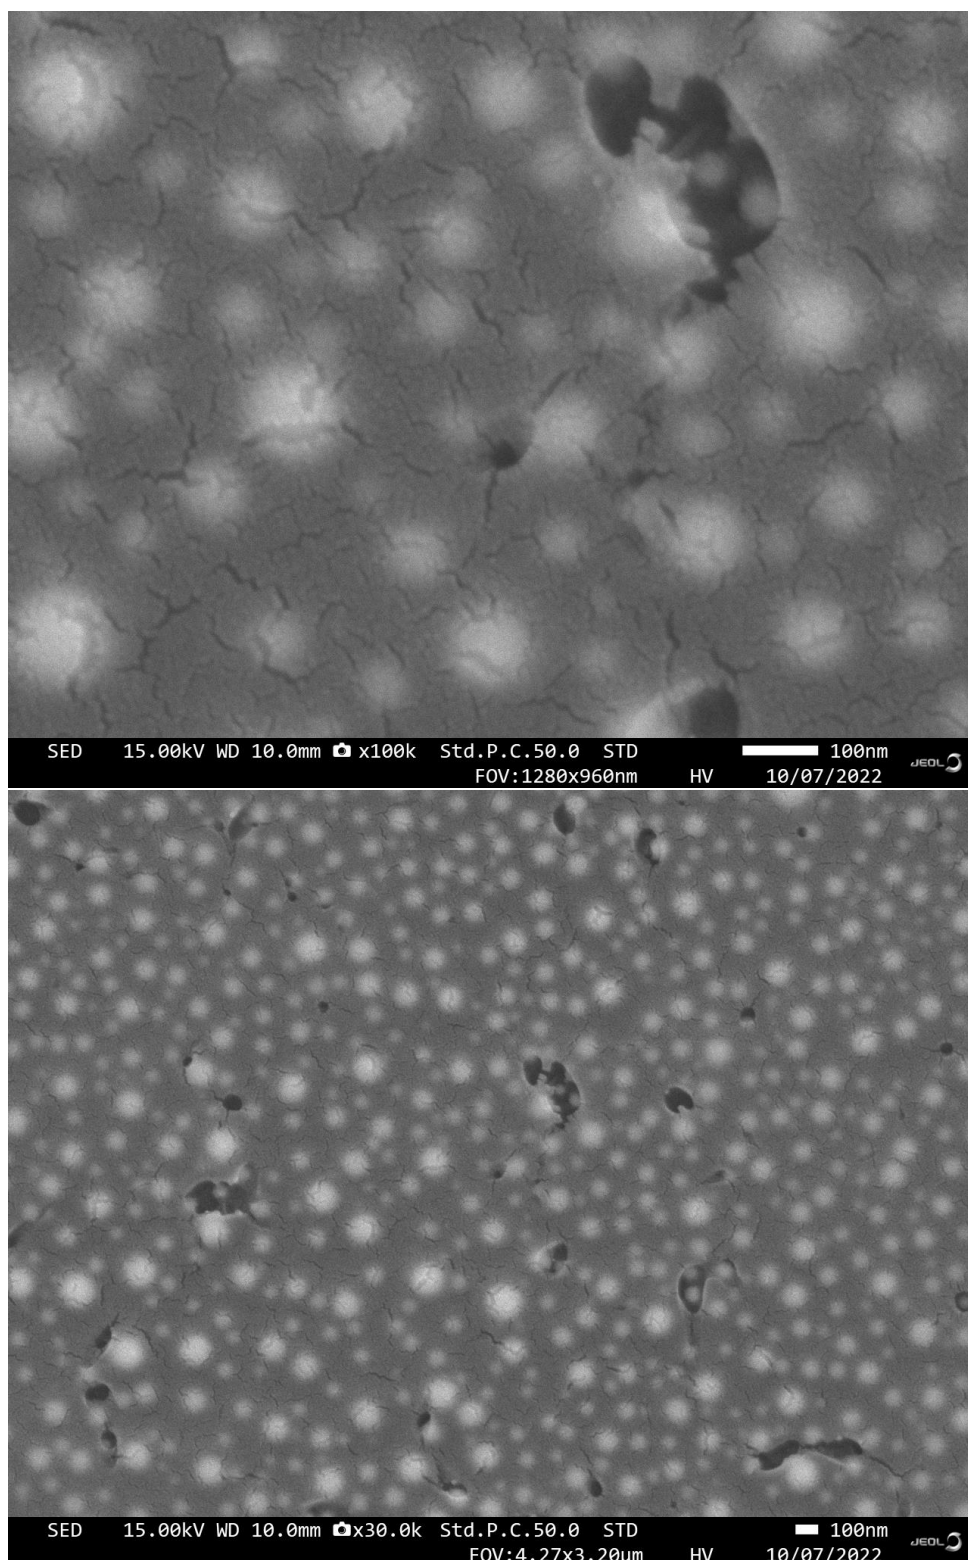

S8 XPS of sparked gold in nitrogen flow with magnetic field

O 1s:27(3-10-2022)

XPS Spectrum Lens Mode:Hybrid Resolution:Pass energy 20 Iris(Aper):slot(Slot)  
Acqn. Time(s): 121 Sweeps: 2 Anode:Mono(Al (Mono))(150 W) Step(meV): 100.0  
Dwell Time(ms): 261 Charge Neutraliser :On Acquired On :22/10/03 10:36:42

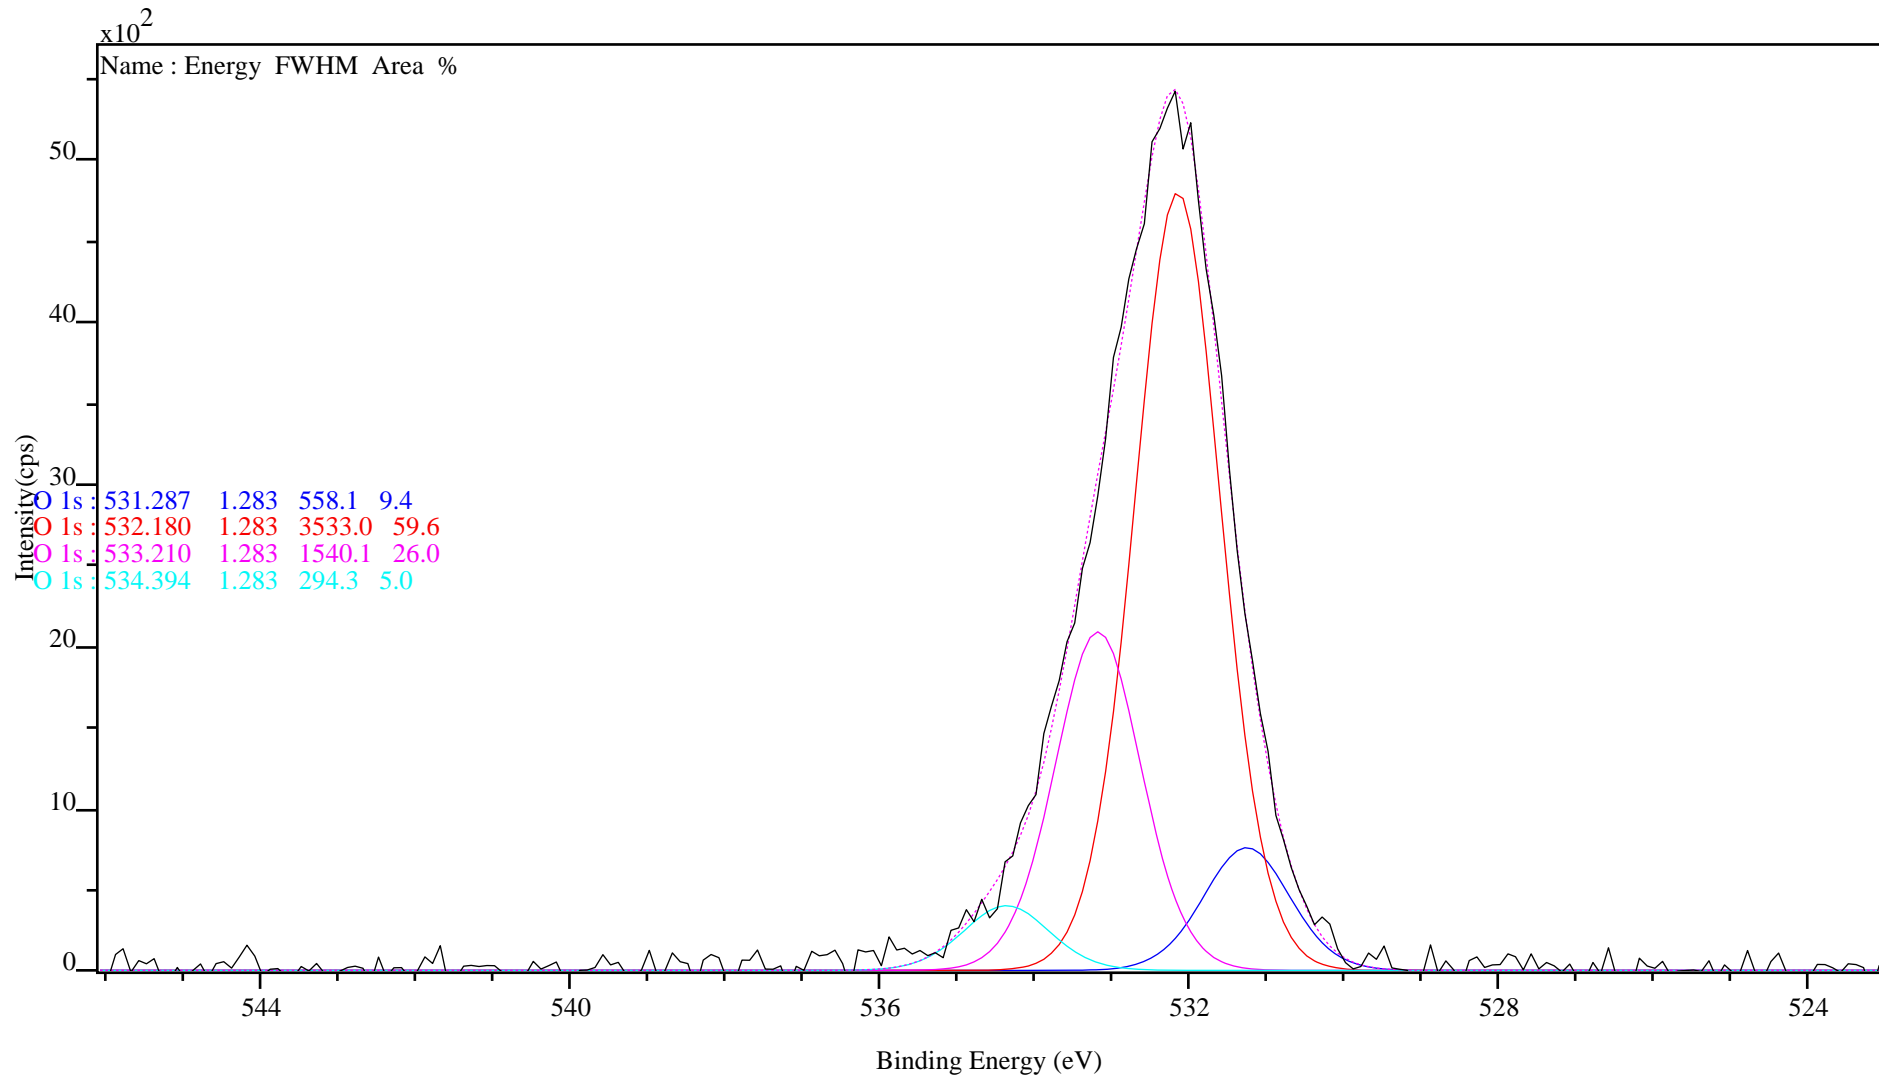

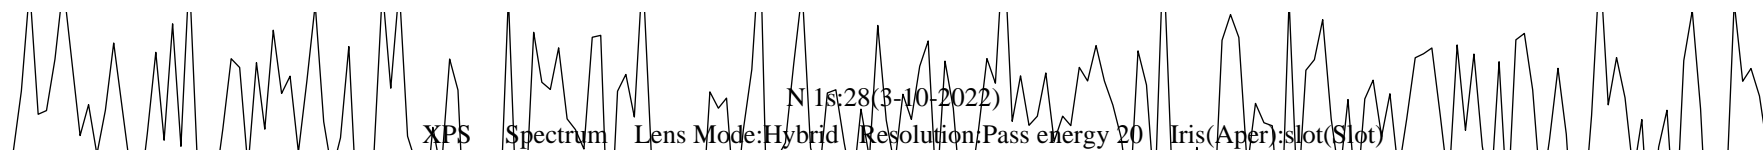

Acqn. Time(s): 121 Sweeps: 2 Anode: Mono(Al (Mono))(150 W) Step(meV): 100.0

Dwell Time(ms): 286 Charge Neutraliser :On Acquired On :22/10/03 10:36:42

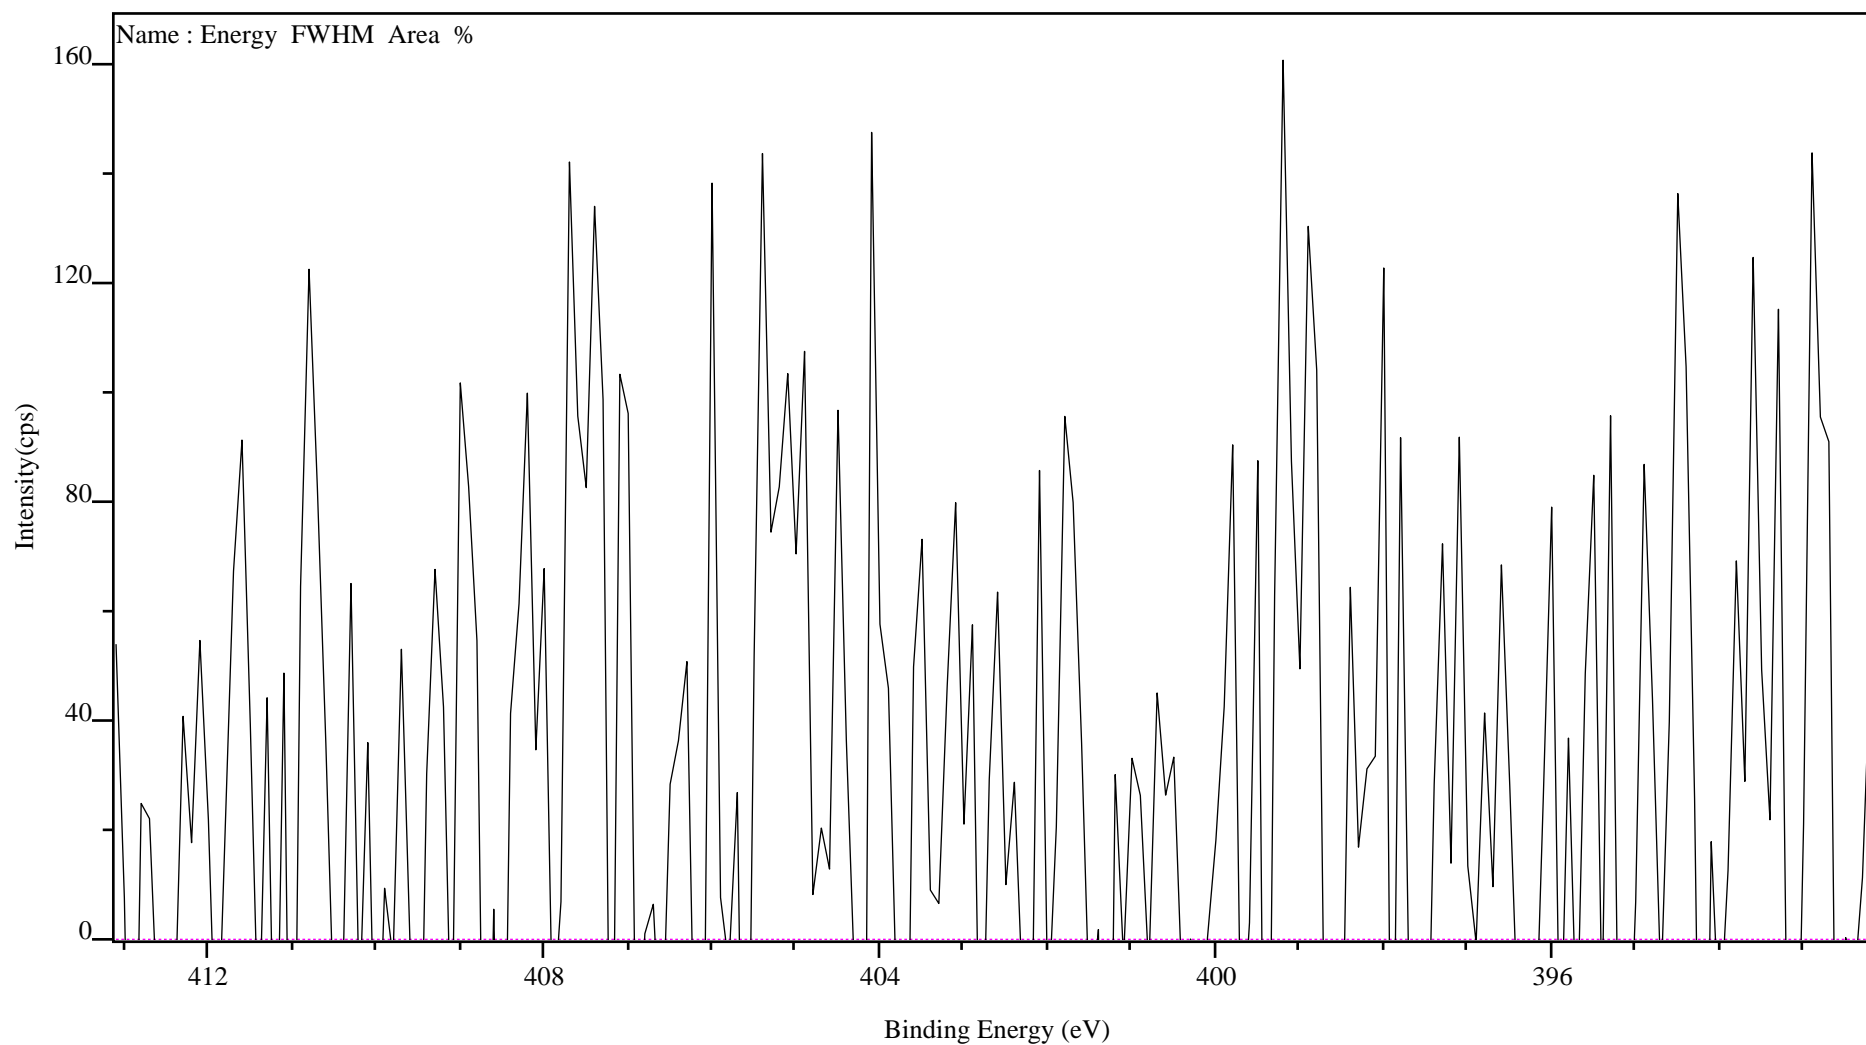

C 1s:29(3-10-2022)

XPS Spectrum Lens Mode:Hybrid Resolution:Pass energy 20 Iris(Aper):slot(Slot)  
Acqn. Time(s): 120 Sweeps: 2 Anode:Mono(Al (Mono))(150 W) Step(meV): 100.0  
Dwell Time(ms): 250 Charge Neutraliser :On Acquired On :22/10/03 10:36:42

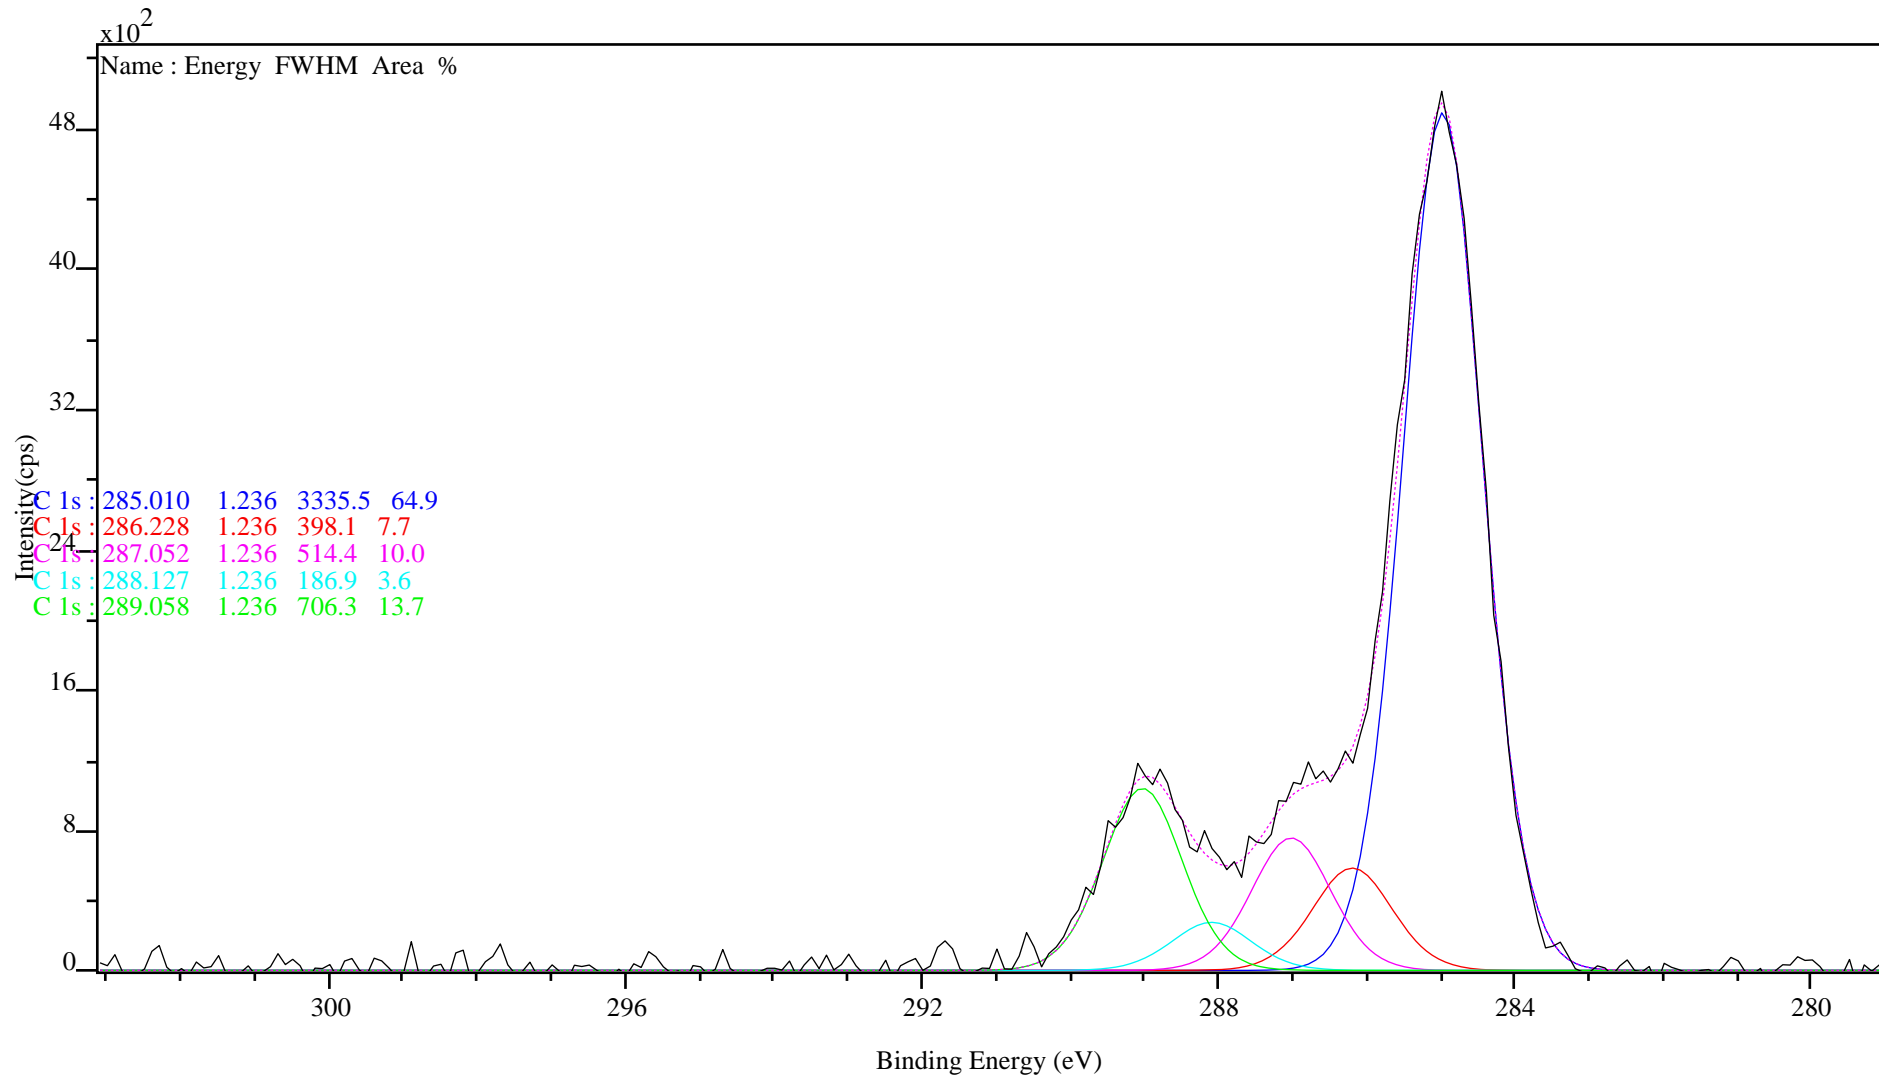

Au 4f:30(3-10-2022)

XPS Spectrum Lens Mode:Hybrid Resolution:Pass energy 20 Iris(Aper):slot(Slot)  
Acqn. Time(s): 121 Sweeps: 2 Anode:Mono(Al (Mono))(150 W) Step(meV): 100.0  
Dwell Time(ms): 400 Charge Neutraliser :On Acquired On :22/10/03 10:36:42

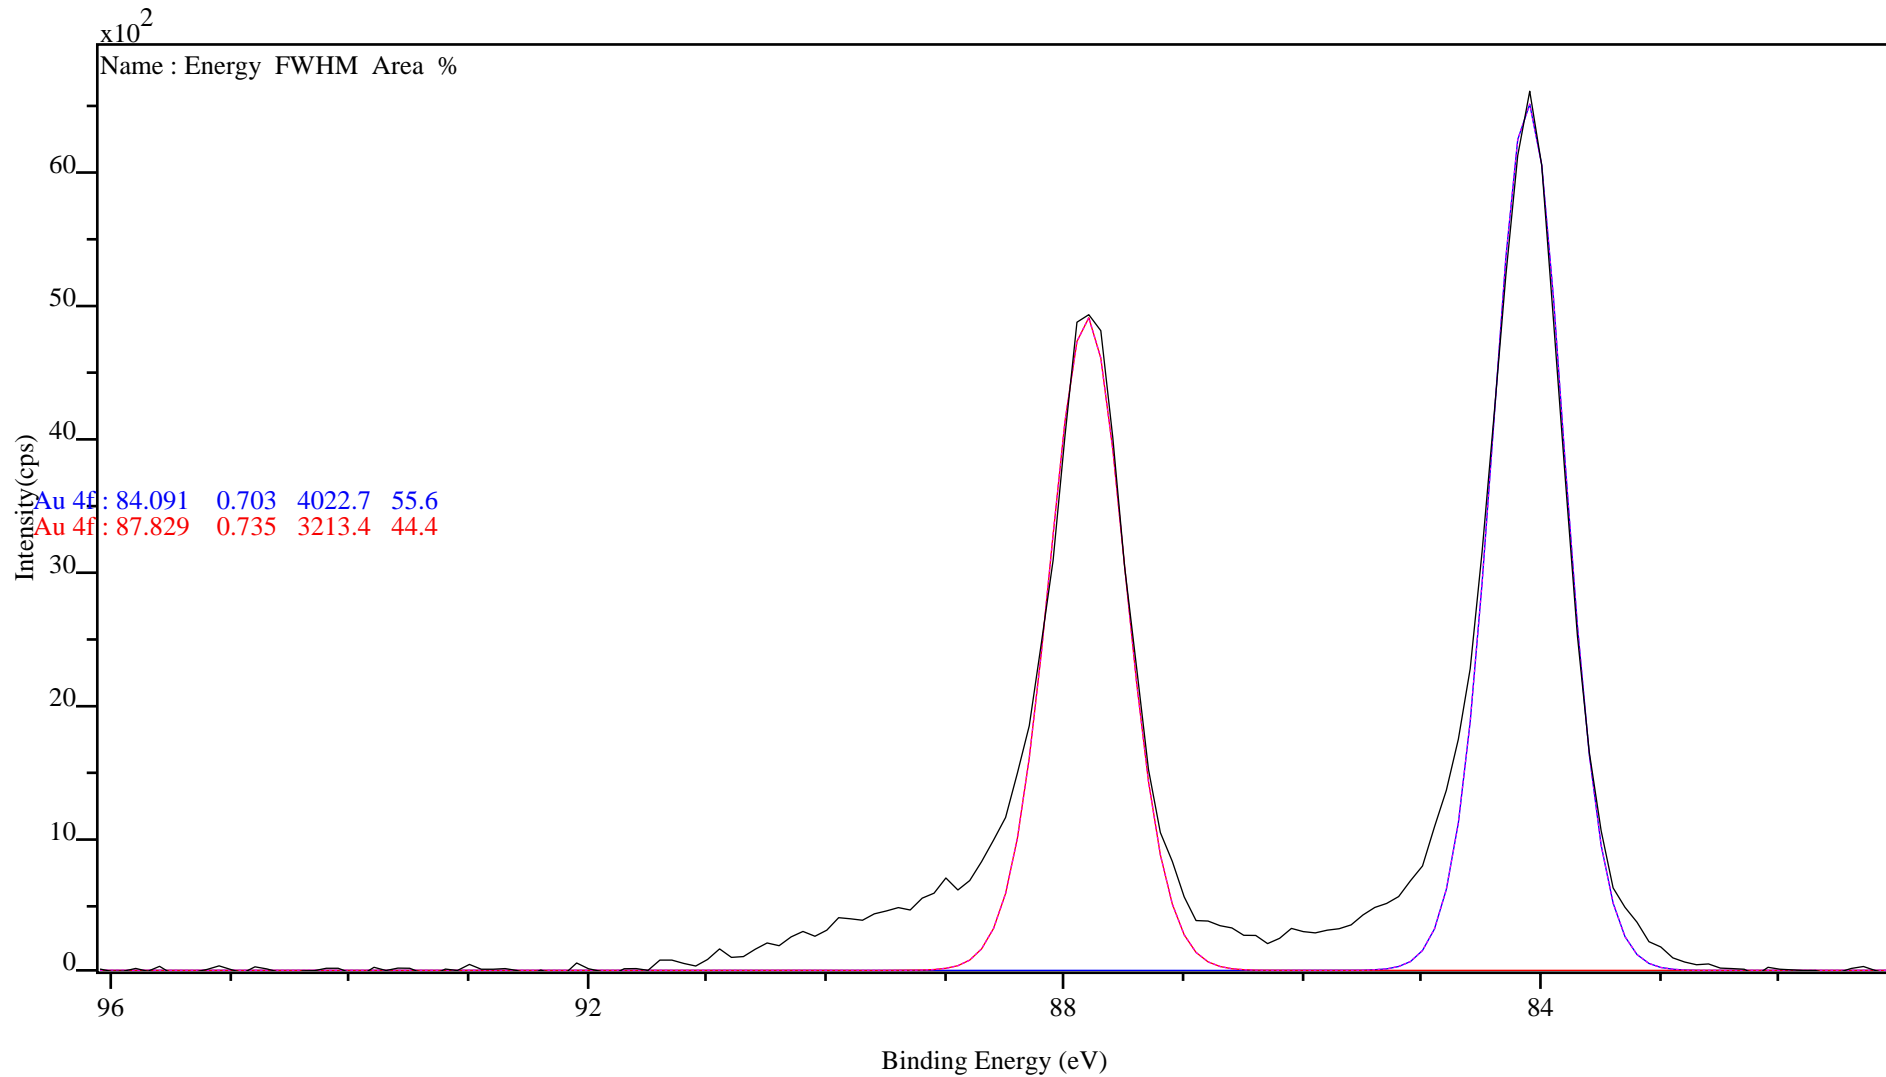

Valence:31(3-10-2022)

XPS Spectrum Lens Mode:Hybrid Resolution:Pass energy 20 Iris(Aper):slot(Slot)  
Acqn. Time(s): 121 Sweeps: 2 Anode:Mono(Al (Mono))(150 W) Step(meV): 100.0  
Dwell Time(ms): 300 Charge Neutraliser :On Acquired On :22/10/03 10:36:42

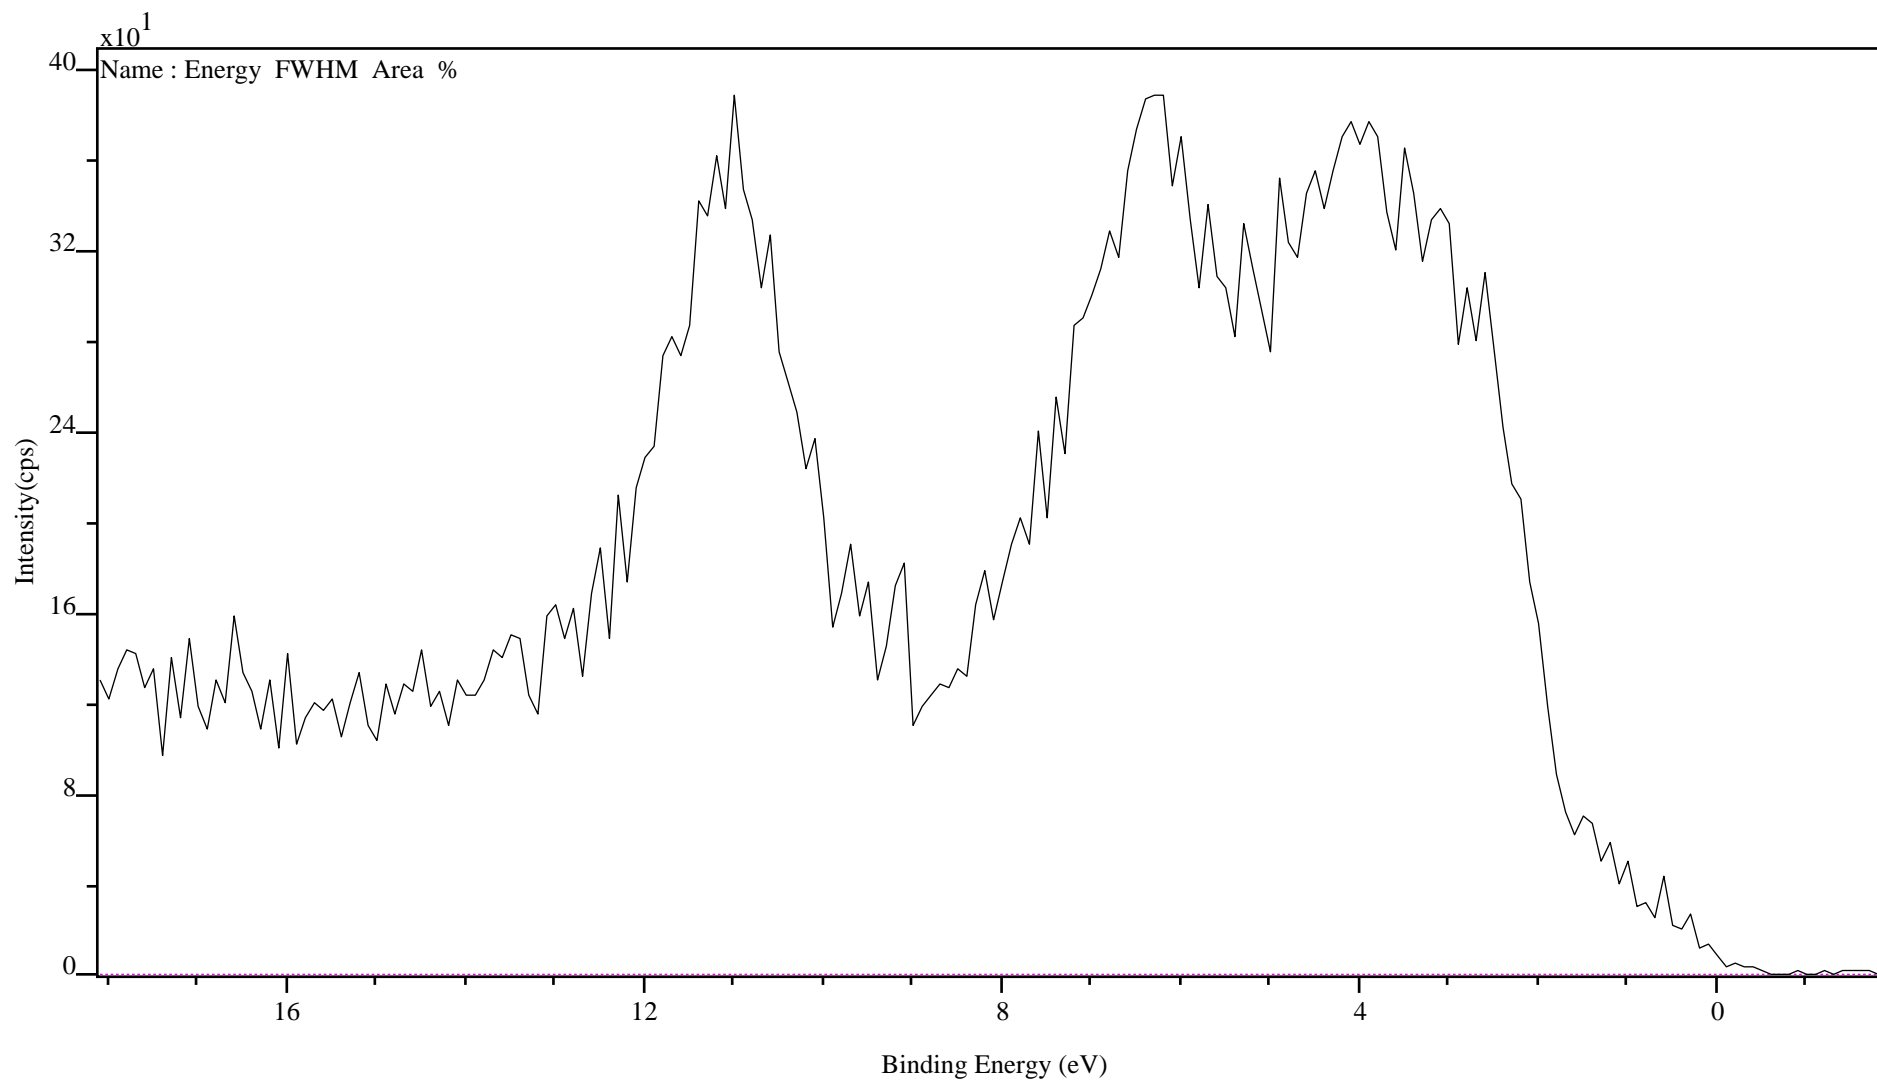



wide:26(3-10-2022)  
XPS Spectrum Lens Mode:Hybrid Resolution:Pass energy 80 Iris(Aper):slot(Slot)  
Acqn. Time(s): 121 Sweeps: 1 Anode:Mono(Al (Mono))(150 W) Step(meV): 1000.0  
Dwell Time(ms): 100 Charge Neutraliser :On Acquired On :22/10/03 10:33:44

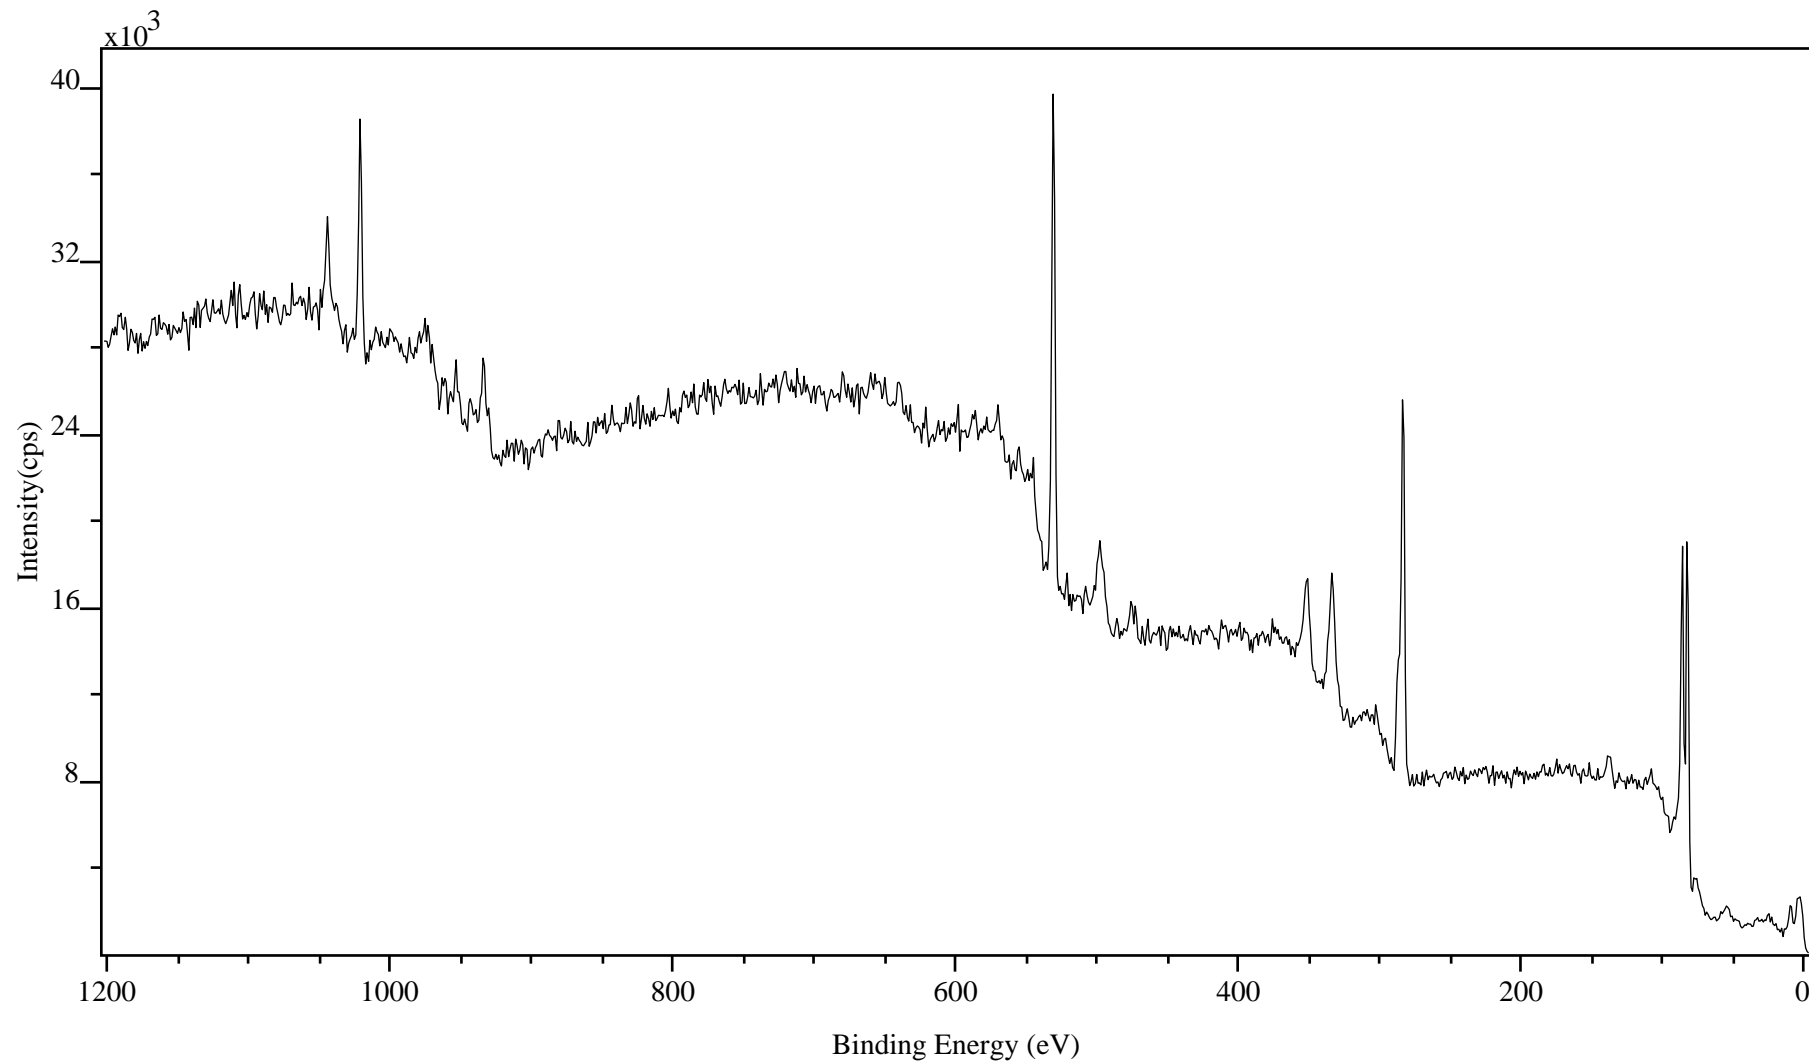

Supplement: s1 [file s1]
